# Supplementary material for: Synthesis of different glutathione–sulfur mustard adducts of verified and potential biomarkers
Source: Royal Society of Chemistry journal article supplement (doi:10.1039/c8ra03360a), 2018-01-01

SUPPORTING INFORMATION

# Synthesis of Glutathione-Sulfur Mustard Bioadducts for the Verification of Potential Biomarkers

Andreas Bielmann<sup>[a][b]</sup>, Nicolas Sambiagio<sup>[a][c]</sup>, Nathalie Wehr<sup>[a][b]</sup>, Sandrine Gerber<sup>[c]</sup>,  
Christian G. Bochet<sup>[b]</sup>, Christophe Curty\*<sup>[a]</sup>

<sup>[a]</sup>Spiez Laboratory, Austrasse, 3700 Spiez, Switzerland

<sup>[b]</sup>University of Fribourg, Departement of Chemistry, Chemin du Musée 9, 1700 Fribourg,  
Switzerland

<sup>[c]</sup>Ecole Polytechnique Fédéral de Lausanne, Institute of Chemical Sciences and Engineering,  
Station 6, 1015 Lausanne, Switzerland

[christophe.curty@babs.admin.ch](mailto:christophe.curty@babs.admin.ch)

## Table of Contents

|                                                                             |     |
|-----------------------------------------------------------------------------|-----|
| <sup>1</sup> H NMR and <sup>13</sup> C NMR of <b>1</b>                      | S2  |
| <sup>1</sup> H NMR and <sup>13</sup> C NMR of <b>2</b>                      | S4  |
| <sup>1</sup> H NMR and <sup>13</sup> C NMR of <b>3</b>                      | S6  |
| <sup>1</sup> H NMR and <sup>13</sup> C NMR of <b>4</b> by alkylation of GSH | S7  |
| <sup>1</sup> H NMR and <sup>13</sup> C NMR of <b>5</b>                      | S10 |
| <sup>1</sup> H NMR and <sup>13</sup> C NMR of <b>6</b>                      | S12 |
| <sup>1</sup> H NMR and <sup>13</sup> C NMR of <b>4</b> by SPPS              | S14 |
| <sup>1</sup> H NMR and <sup>13</sup> C NMR of <b>7</b>                      | S16 |
| <sup>1</sup> H NMR and <sup>13</sup> C NMR of <b>11</b>                     | S18 |
| <sup>1</sup> H NMR and <sup>13</sup> C NMR of <b>12</b>                     | S20 |
| <sup>1</sup> H NMR and <sup>13</sup> C NMR of <b>8</b>                      | S22 |
| <sup>1</sup> H NMR and <sup>13</sup> C NMR of <b>14</b>                     | S24 |
| <sup>1</sup> H NMR and <sup>13</sup> C NMR of <b>15</b>                     | S26 |
| <sup>1</sup> H NMR and <sup>13</sup> C NMR of <b>9</b>                      | S28 |

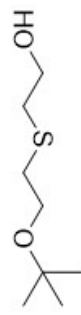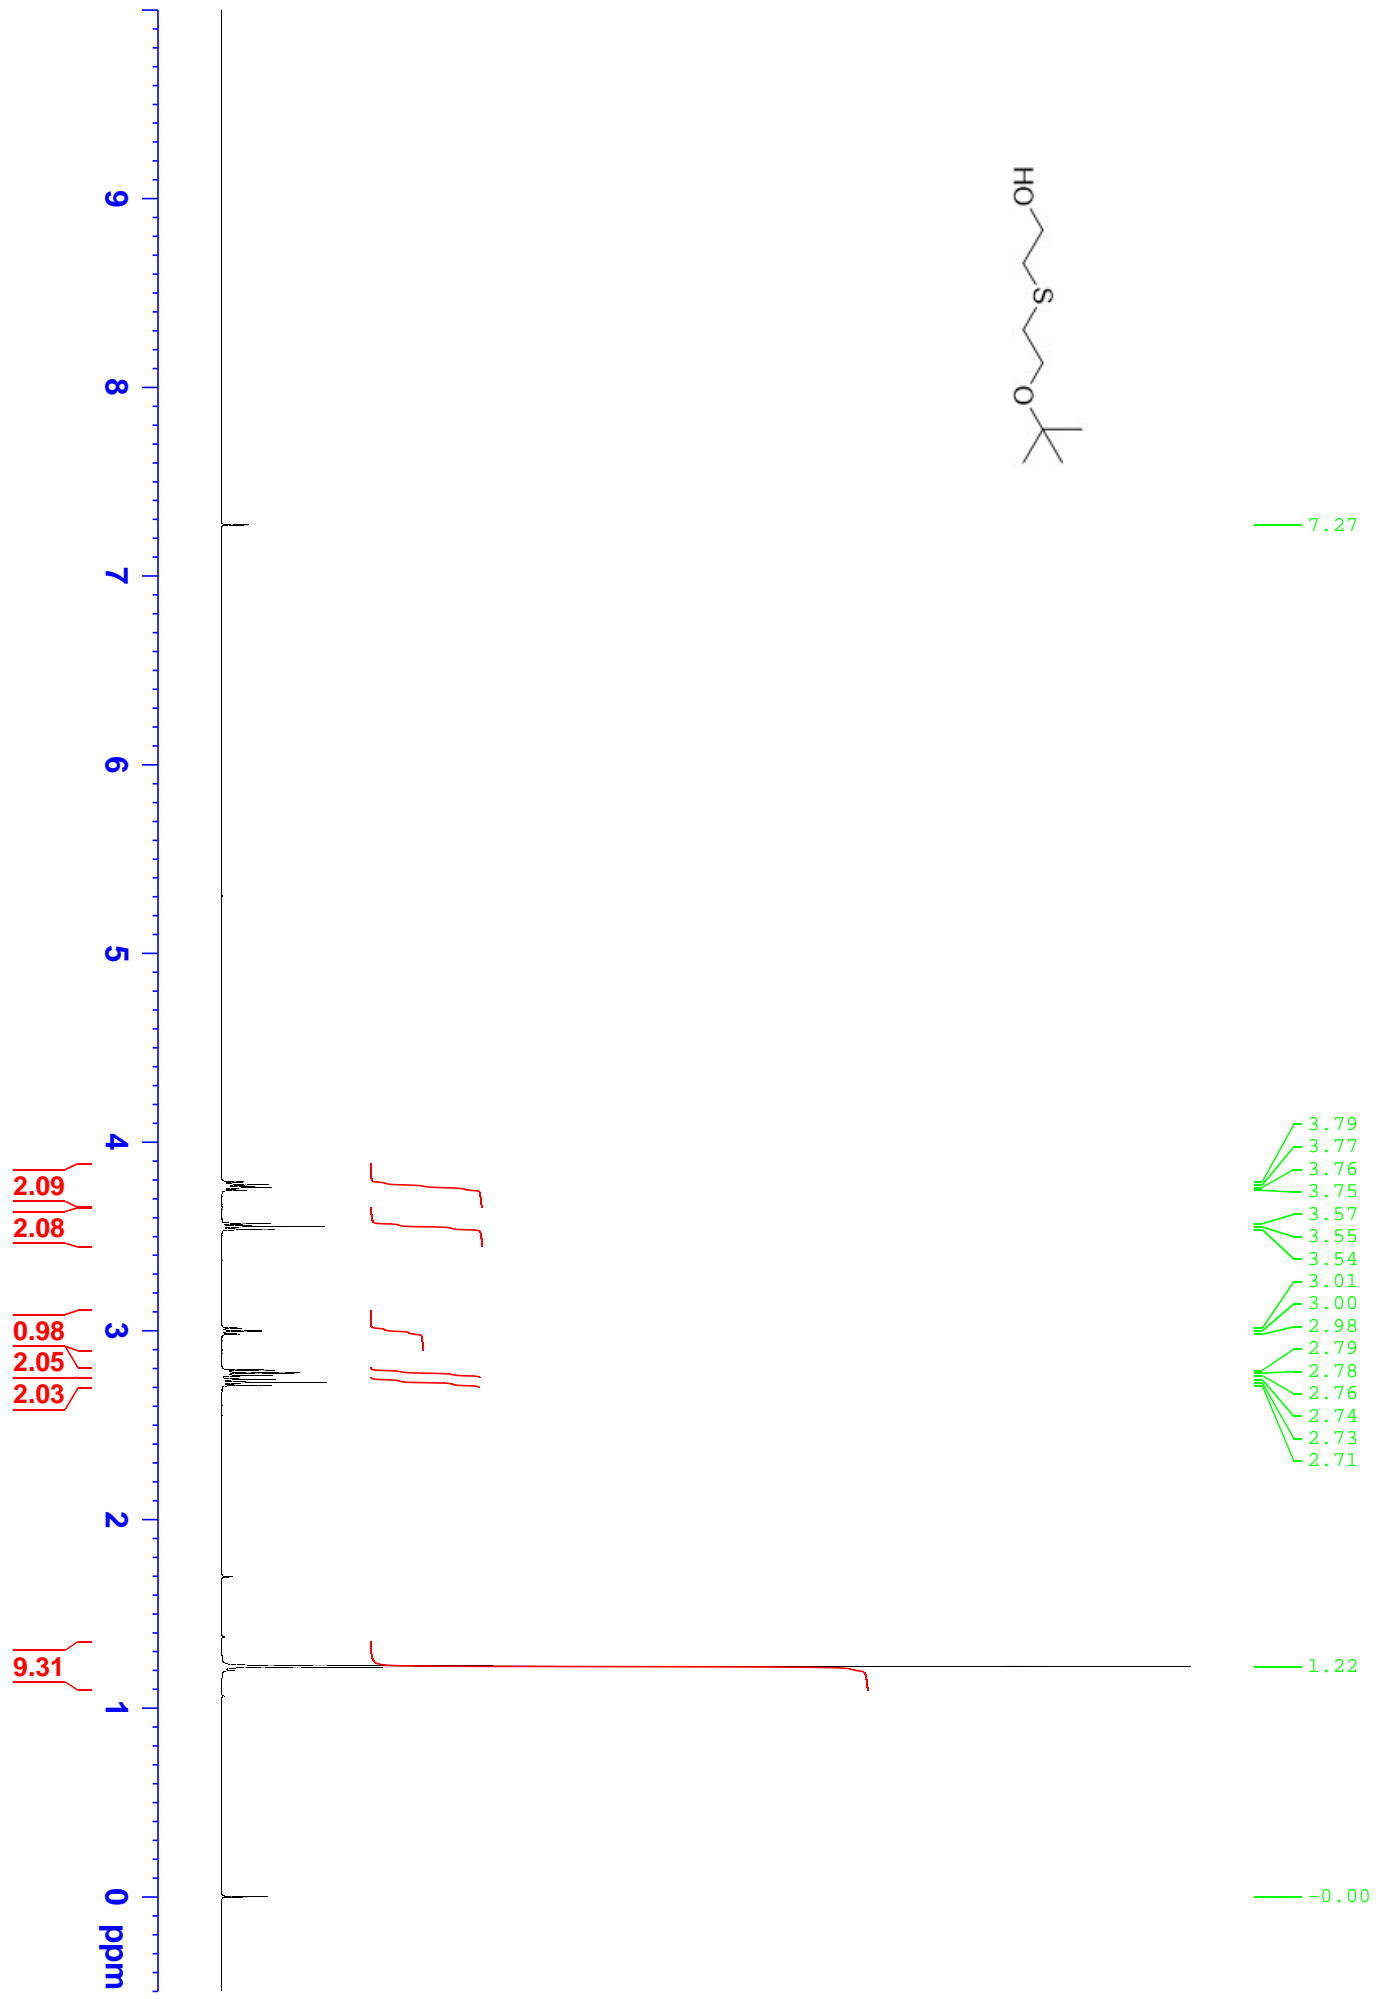

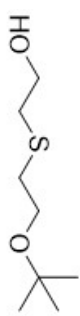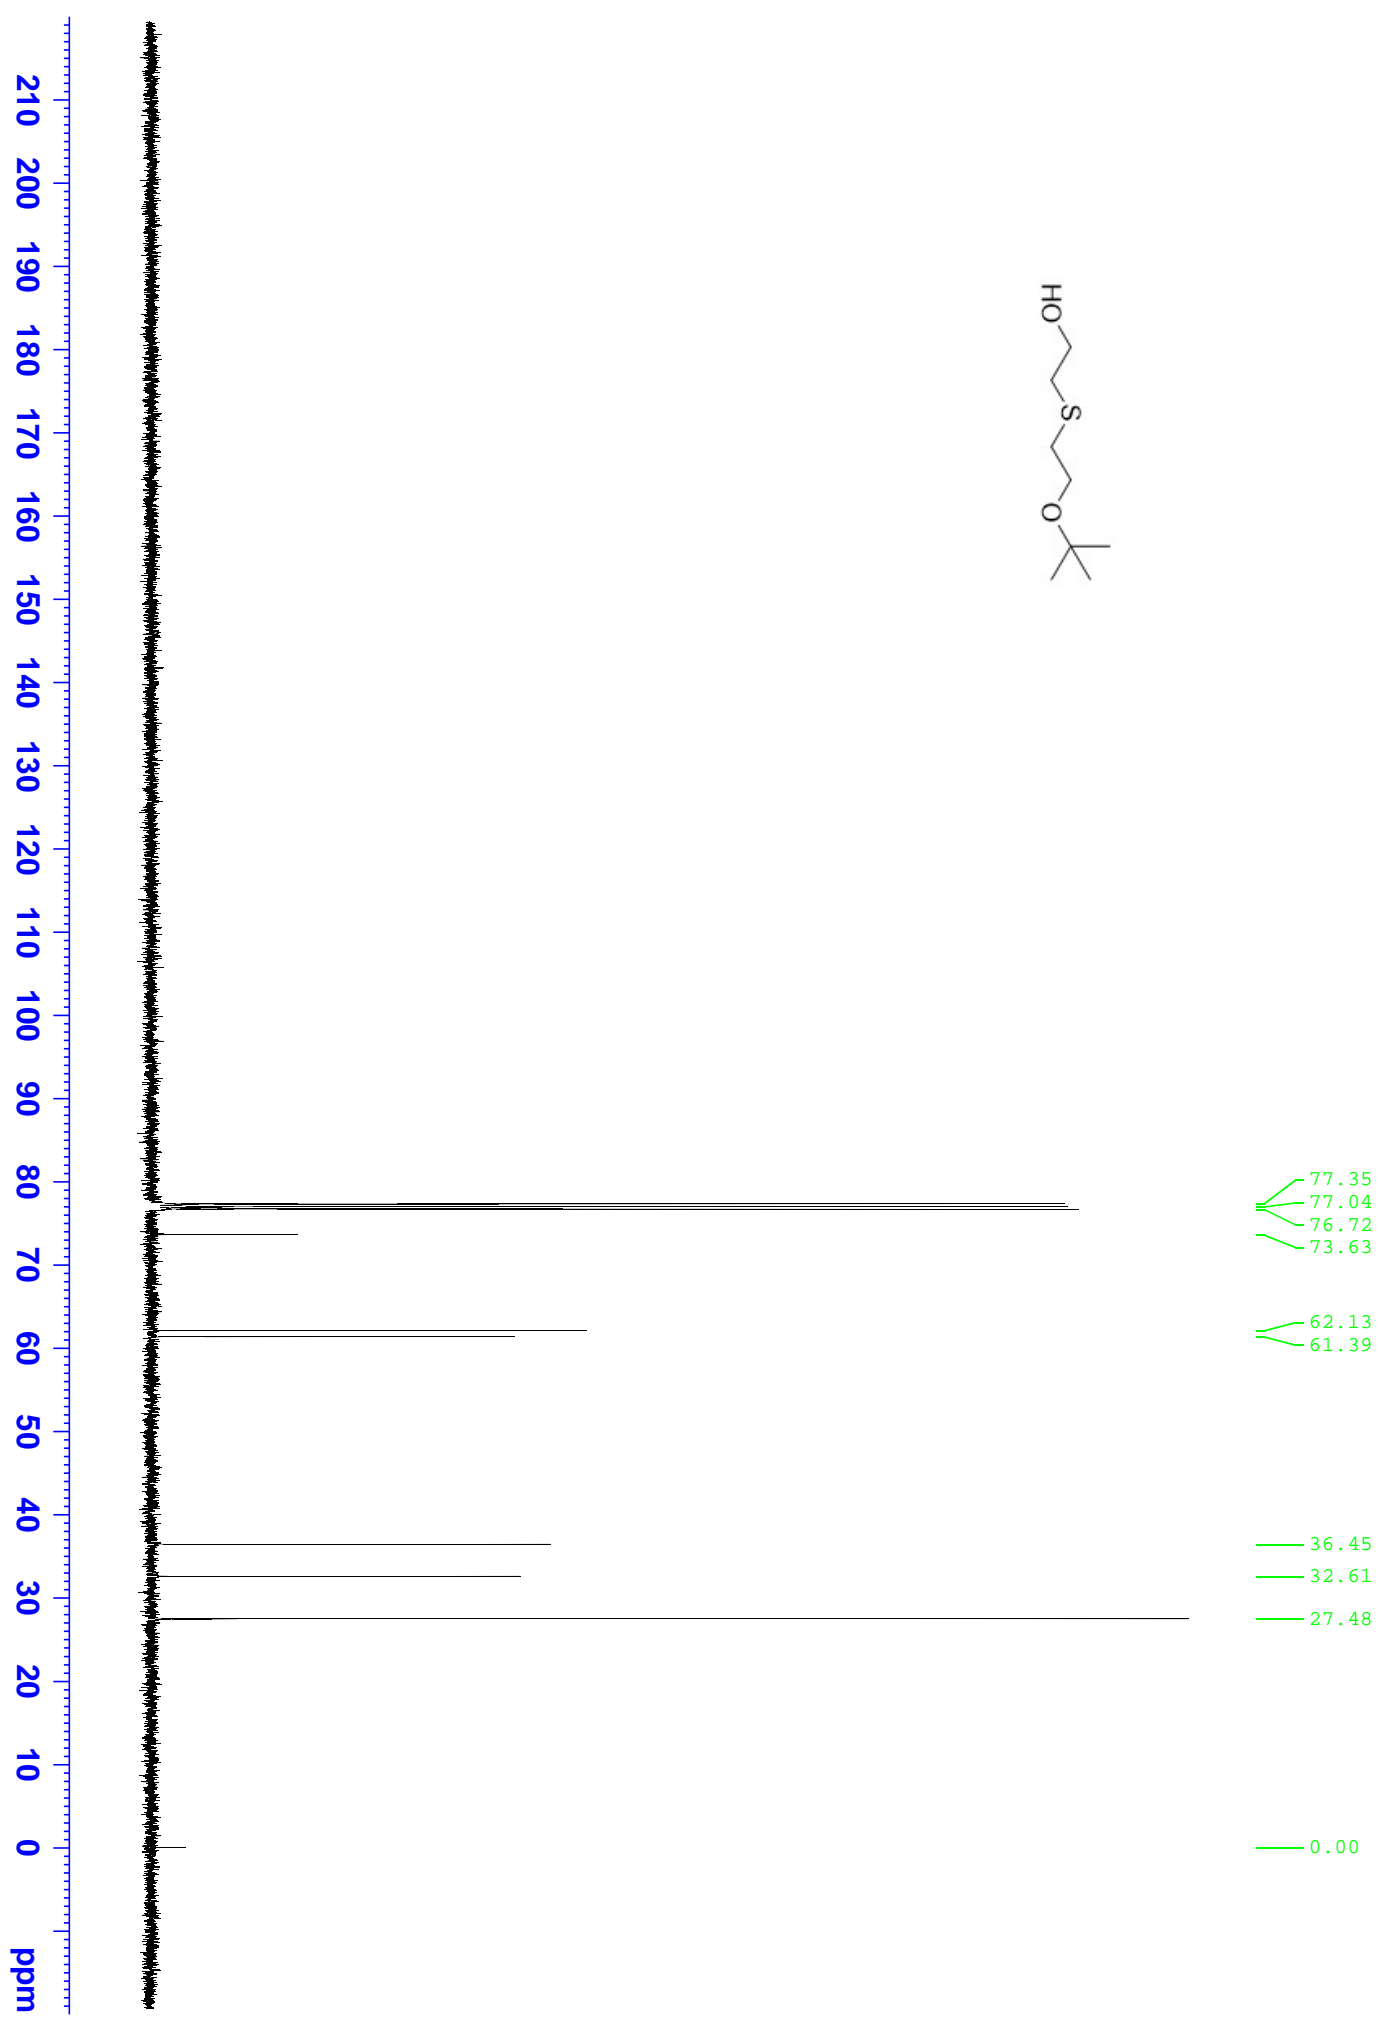

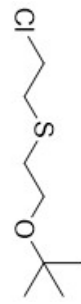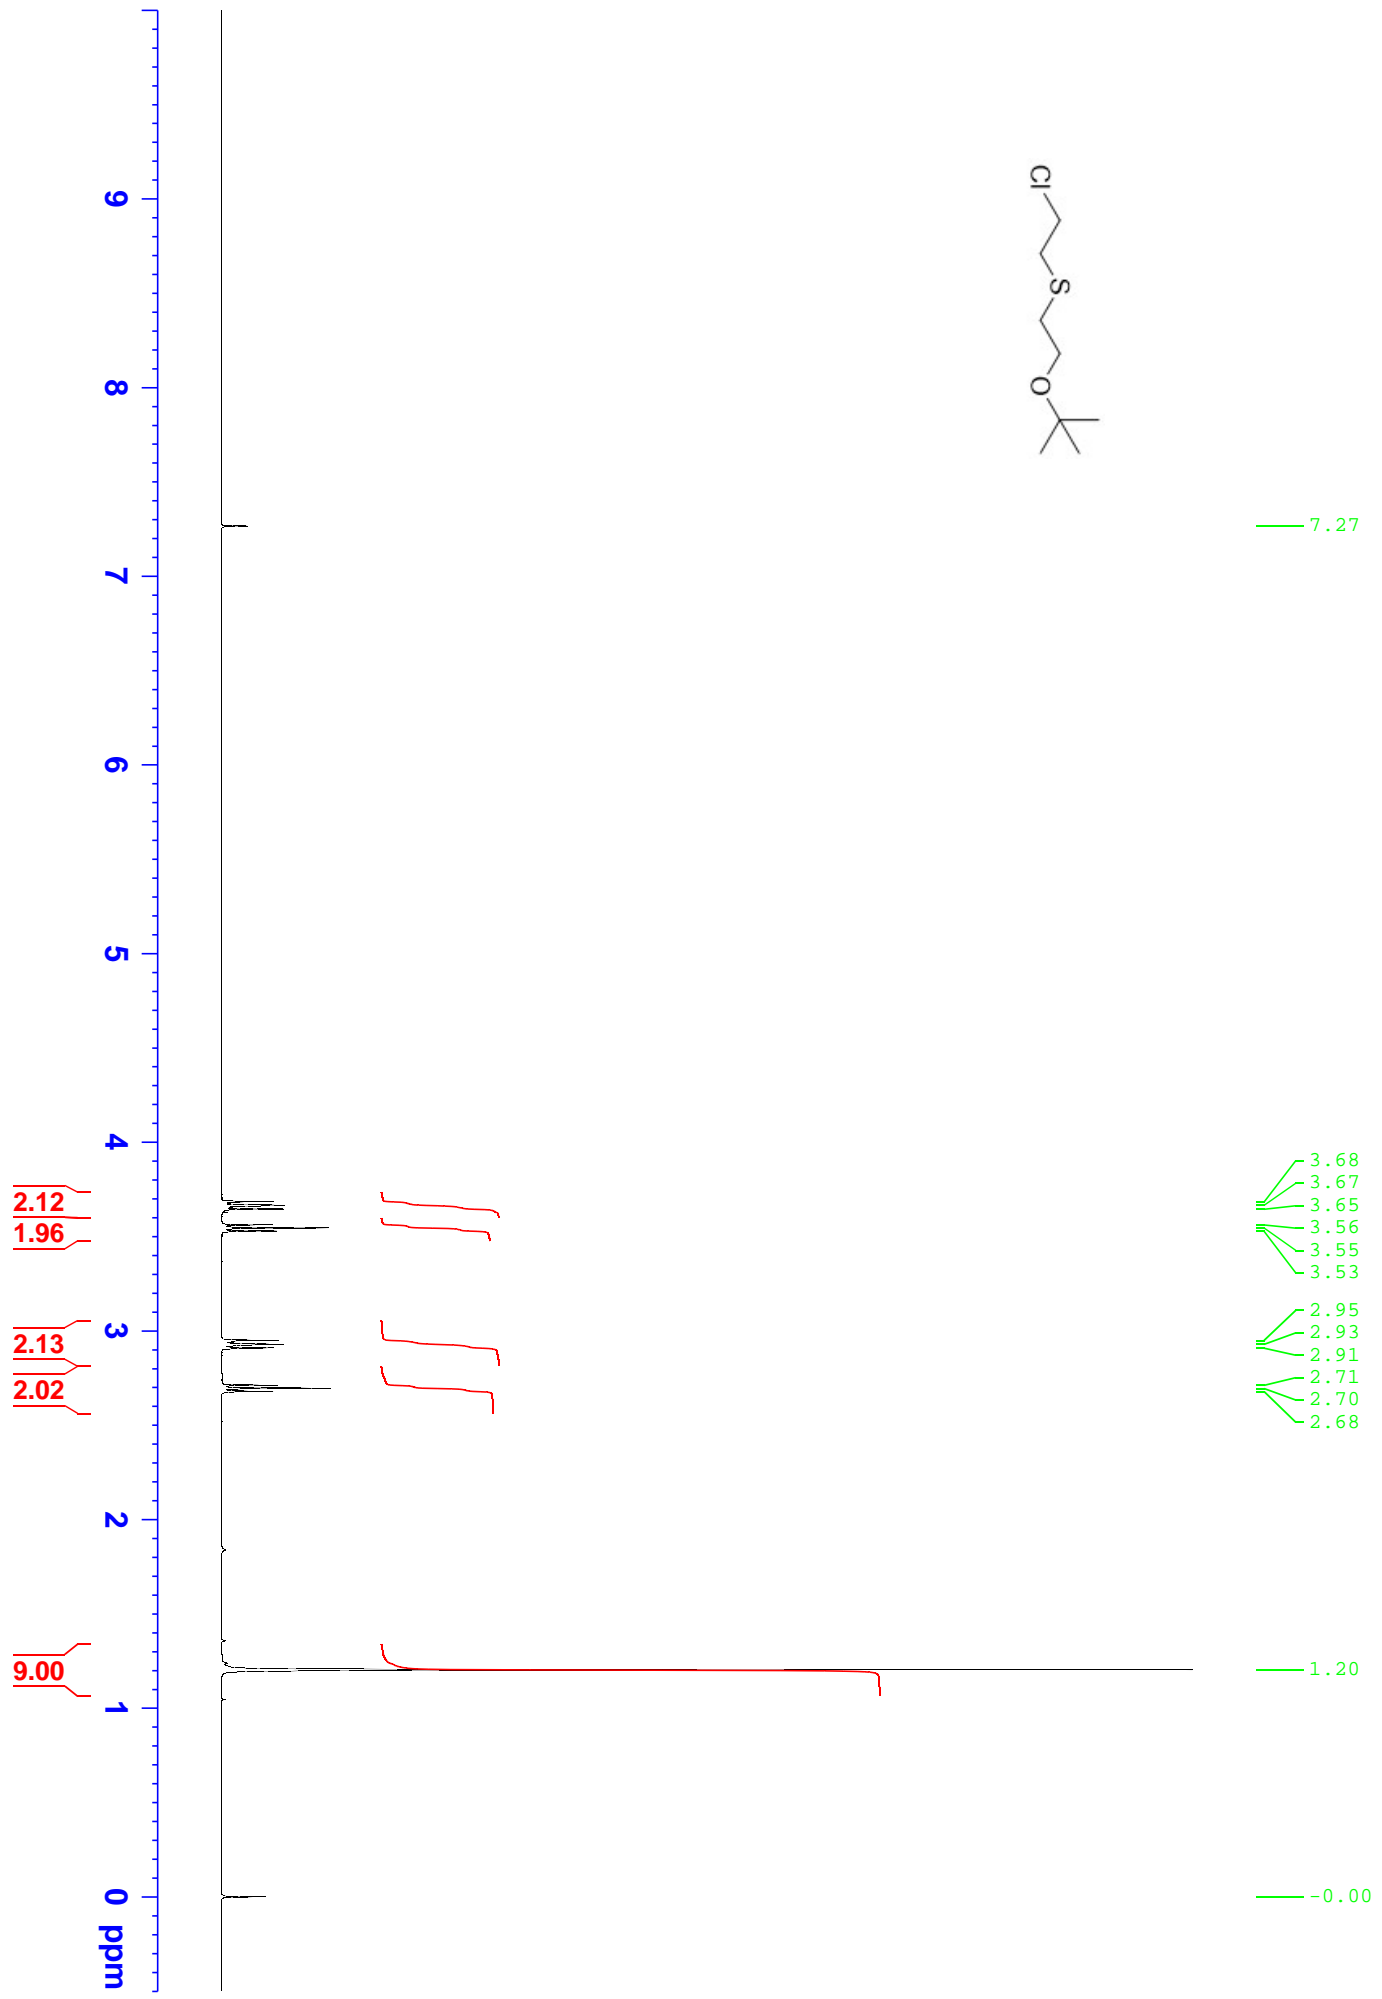

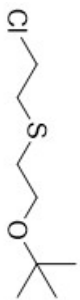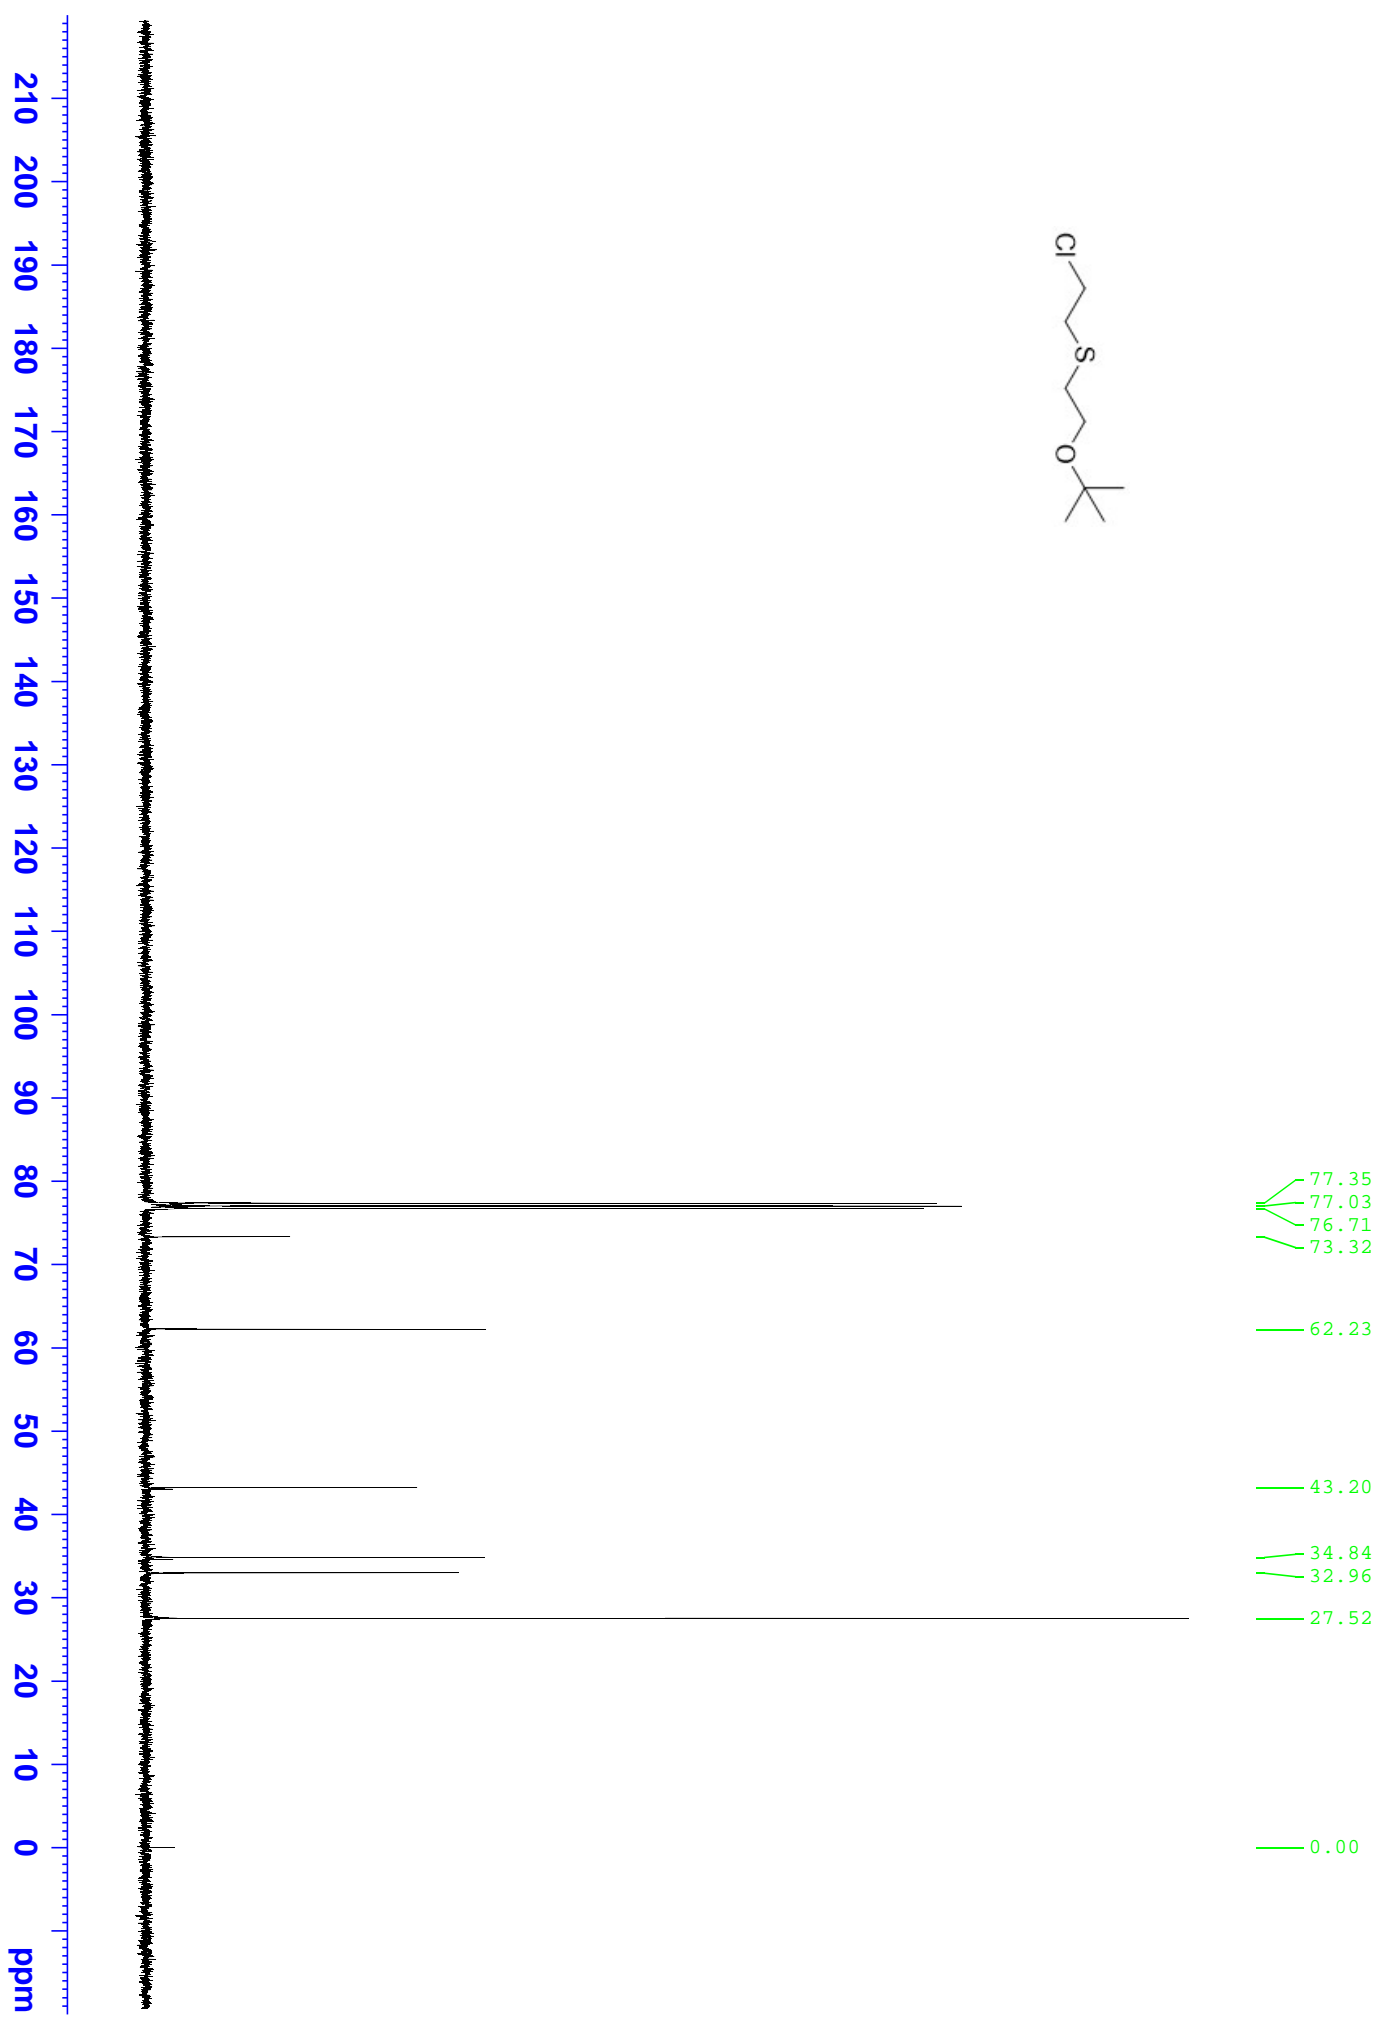

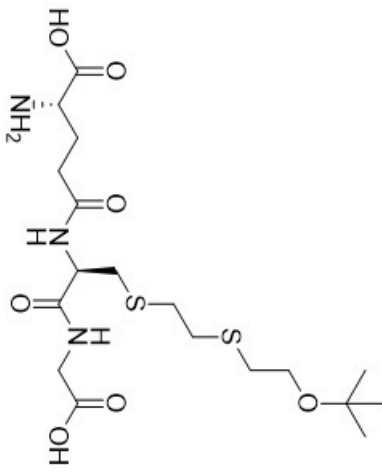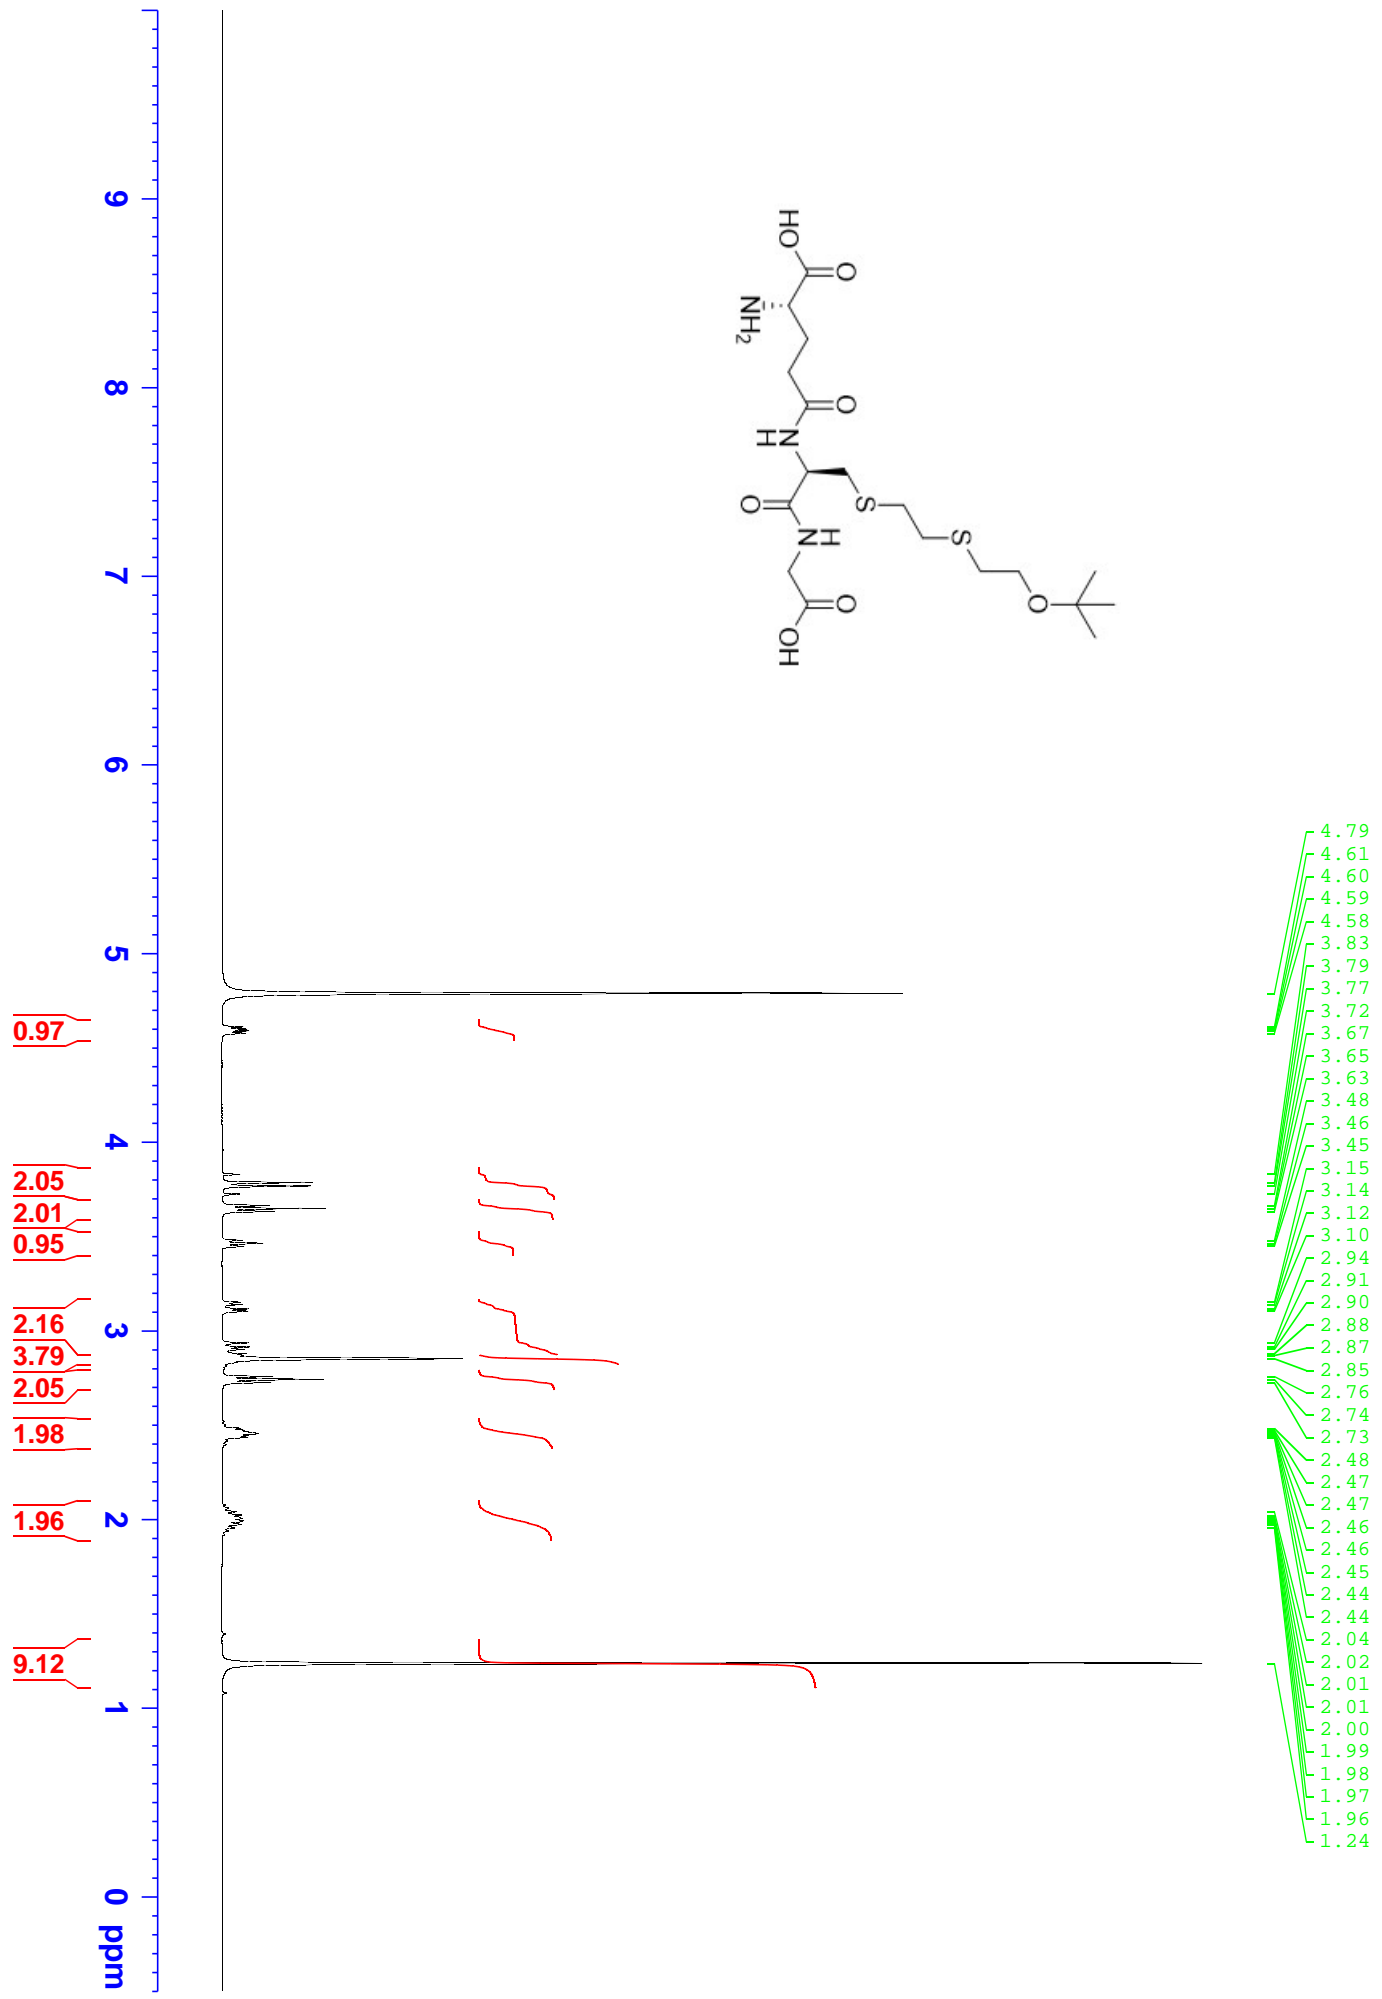

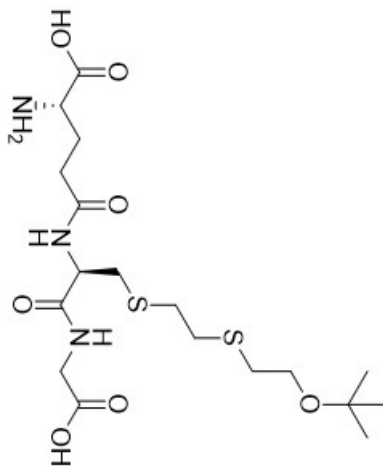

179.24  
176.20  
175.82  
171.92

75.16  
60.98  
55.01  
53.11  
43.39  
32.92  
31.97  
31.57  
31.52  
31.29  
29.08  
26.59

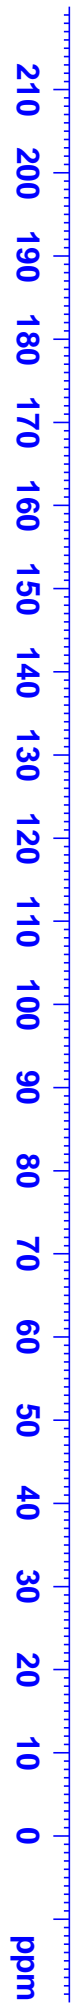

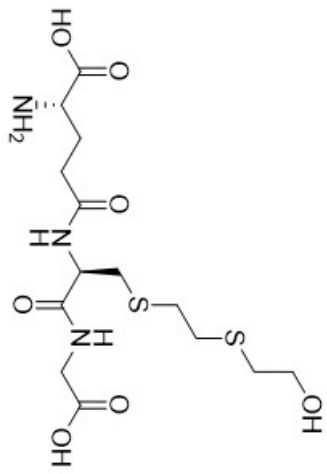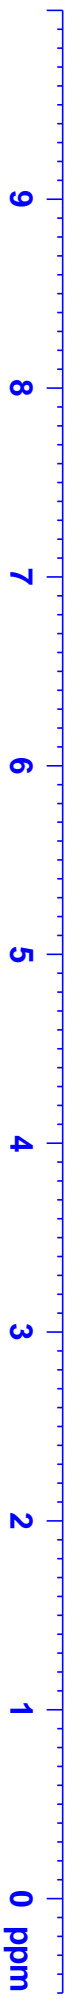

Integration values (from left to right):

- 0.90
- 1.06
- 1.91
- 2.32
- 2.36
- 4.44
- 2.18
- 2.04
- 2.02

Peak chemical shifts (from top to bottom):

- 4.79
- 4.61
- 4.59
- 4.58
- 4.57
- 4.10
- 4.08
- 4.07
- 4.02
- 3.76
- 3.74
- 3.73
- 3.11
- 3.10
- 3.08
- 3.06
- 2.94
- 2.92
- 2.90
- 2.88
- 2.83
- 2.76
- 2.75
- 2.73
- 2.66
- 2.64
- 2.62
- 2.61
- 2.59
- 2.57
- 2.55
- 2.53
- 2.31
- 2.30
- 2.28
- 2.26
- 2.24
- 2.22
- 2.20
- 2.18
- 2.17



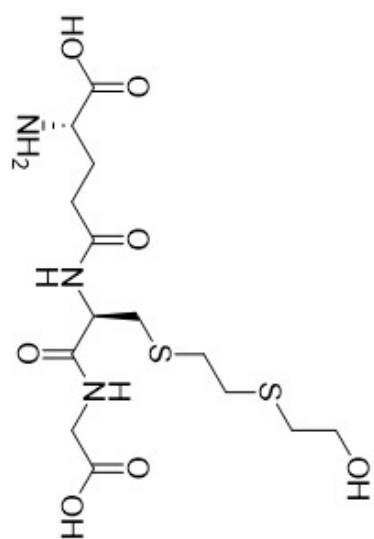

200 190 180 170 160 150 140 130 120 110 100 90 80 70 60 50 40 30 20 10 ppm

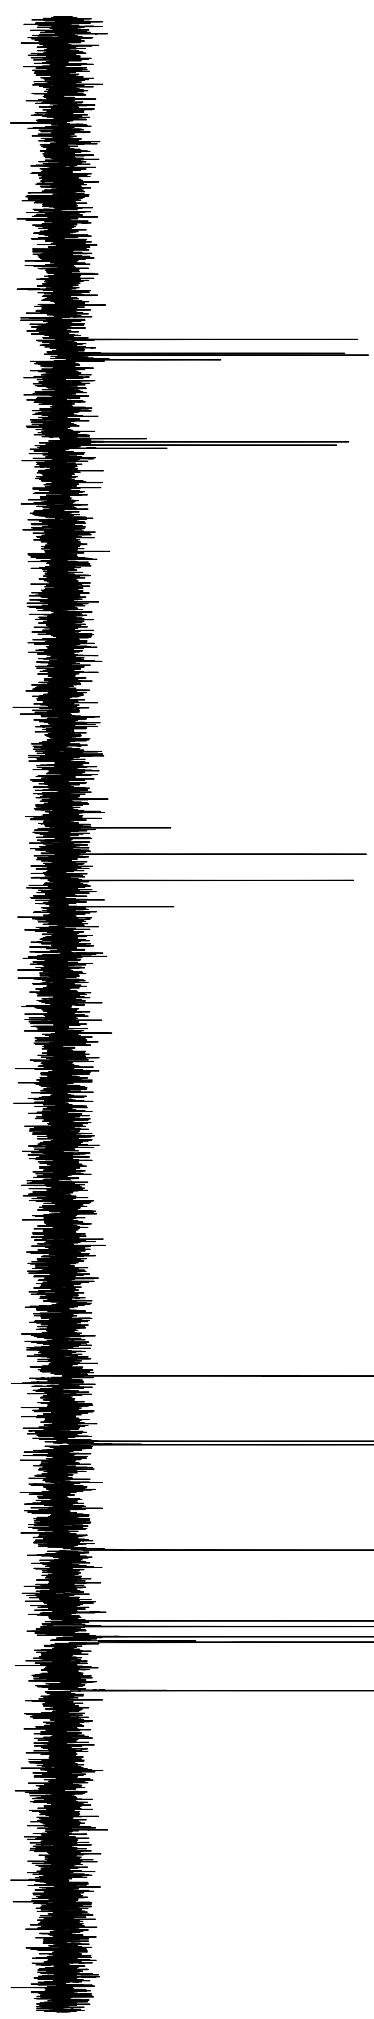

- 174.46
- 172.93
- 172.74
- 172.21
- 163.52
- 163.17
- 162.82
- 162.47
- 120.66
- 117.77
- 114.87
- 111.98
- 60.28
- 53.10
- 52.71
- 41.11
- 33.31
- 32.69
- 31.56
- 31.11
- 30.98
- 25.62

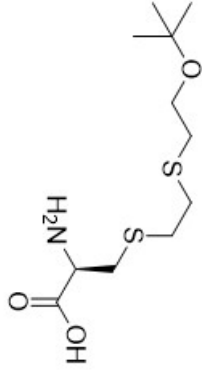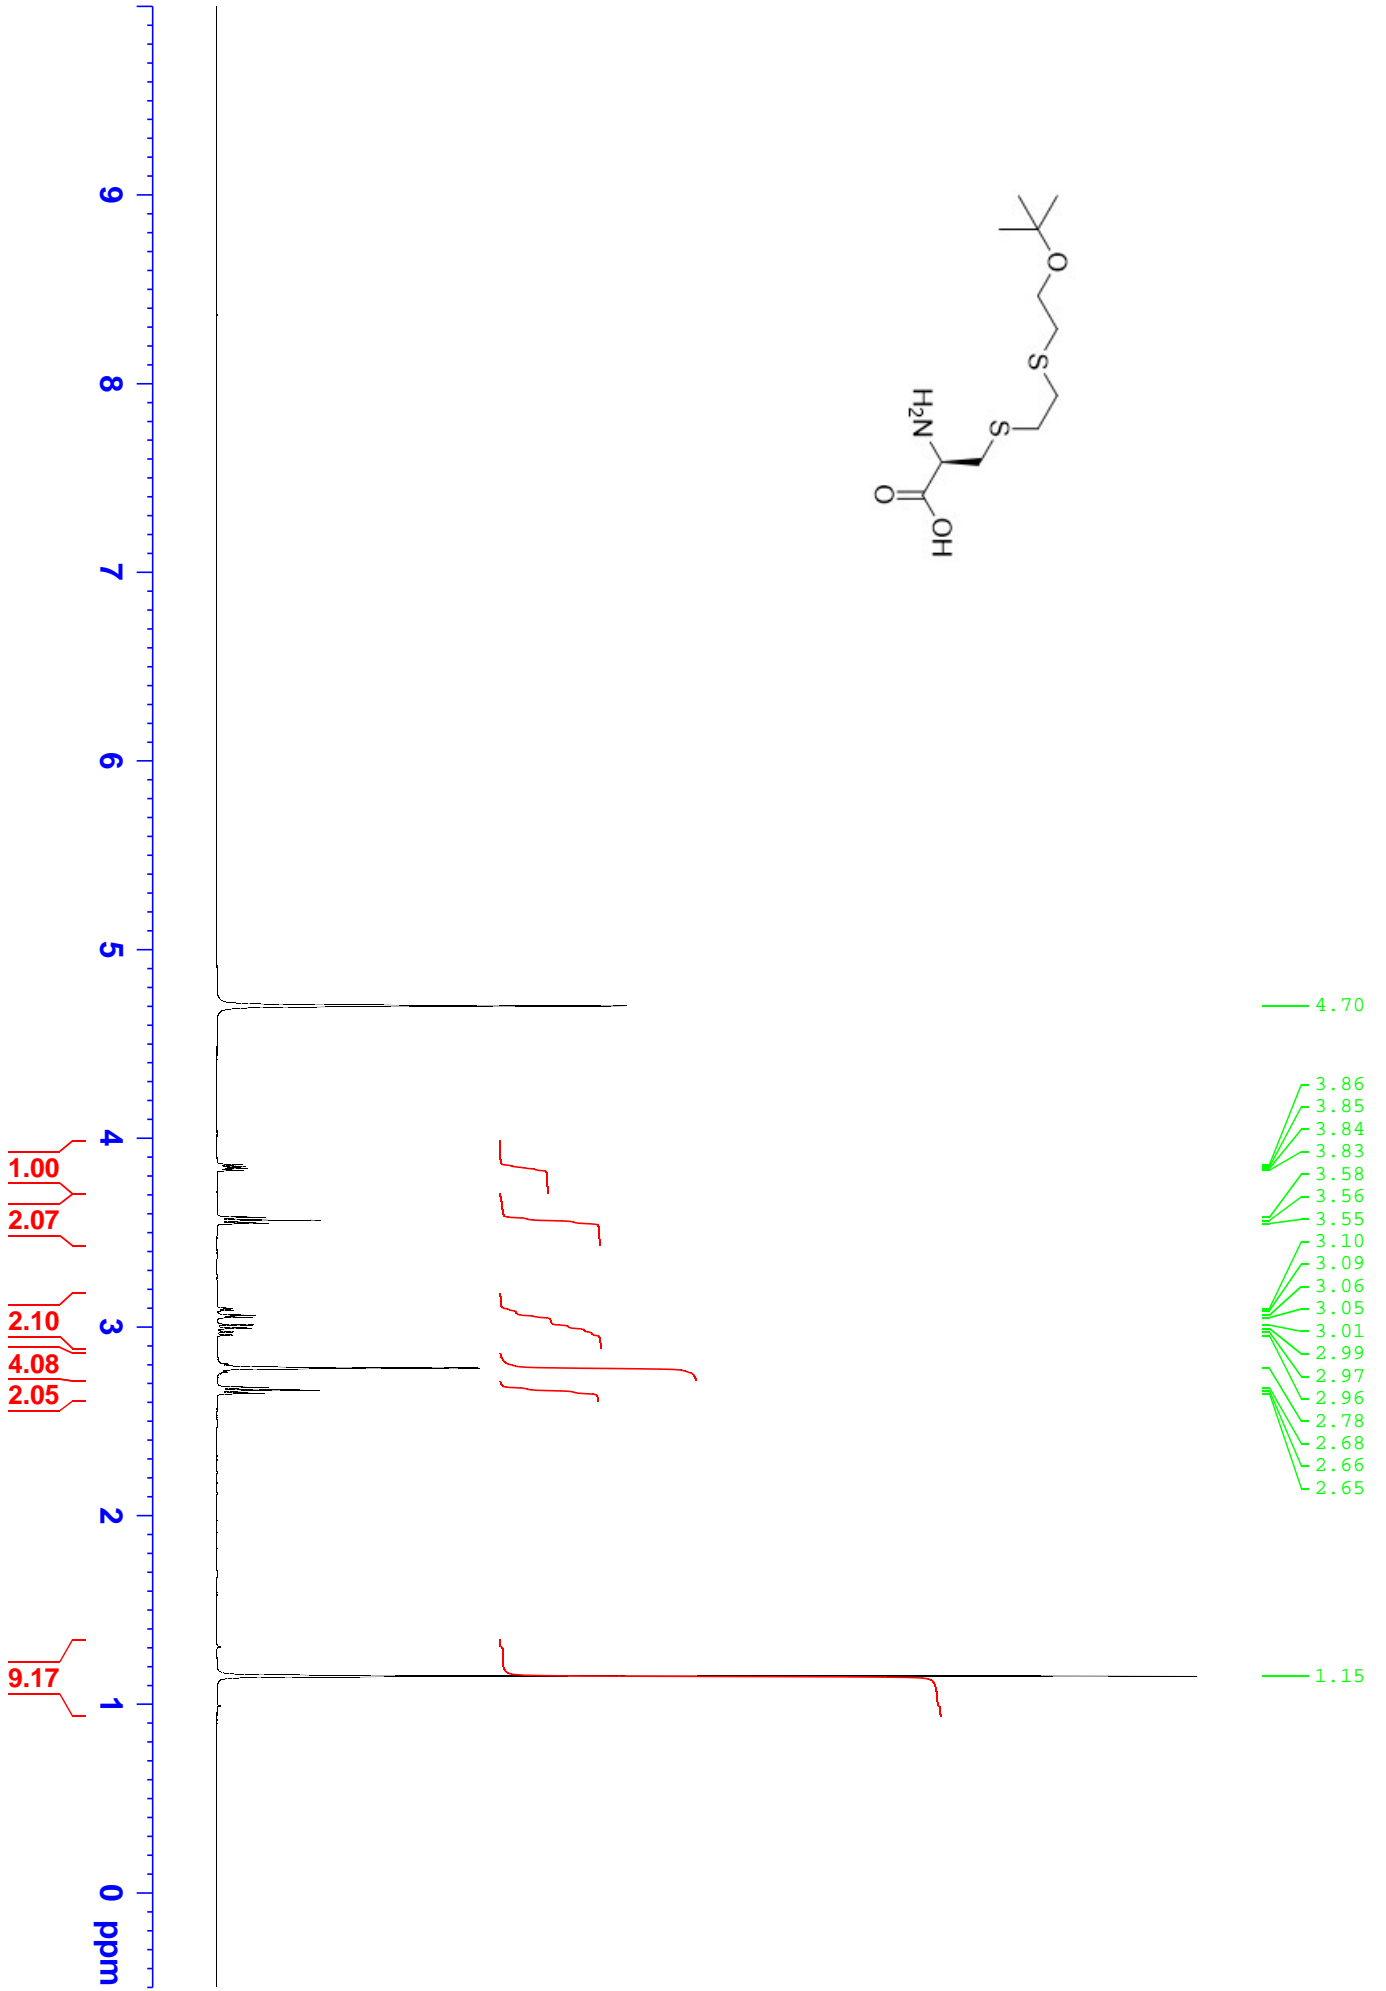

210 200 190 180 170 160 150 140 130 120 110 100 90 80 70 60 50 40 30 20 10 0 ppm

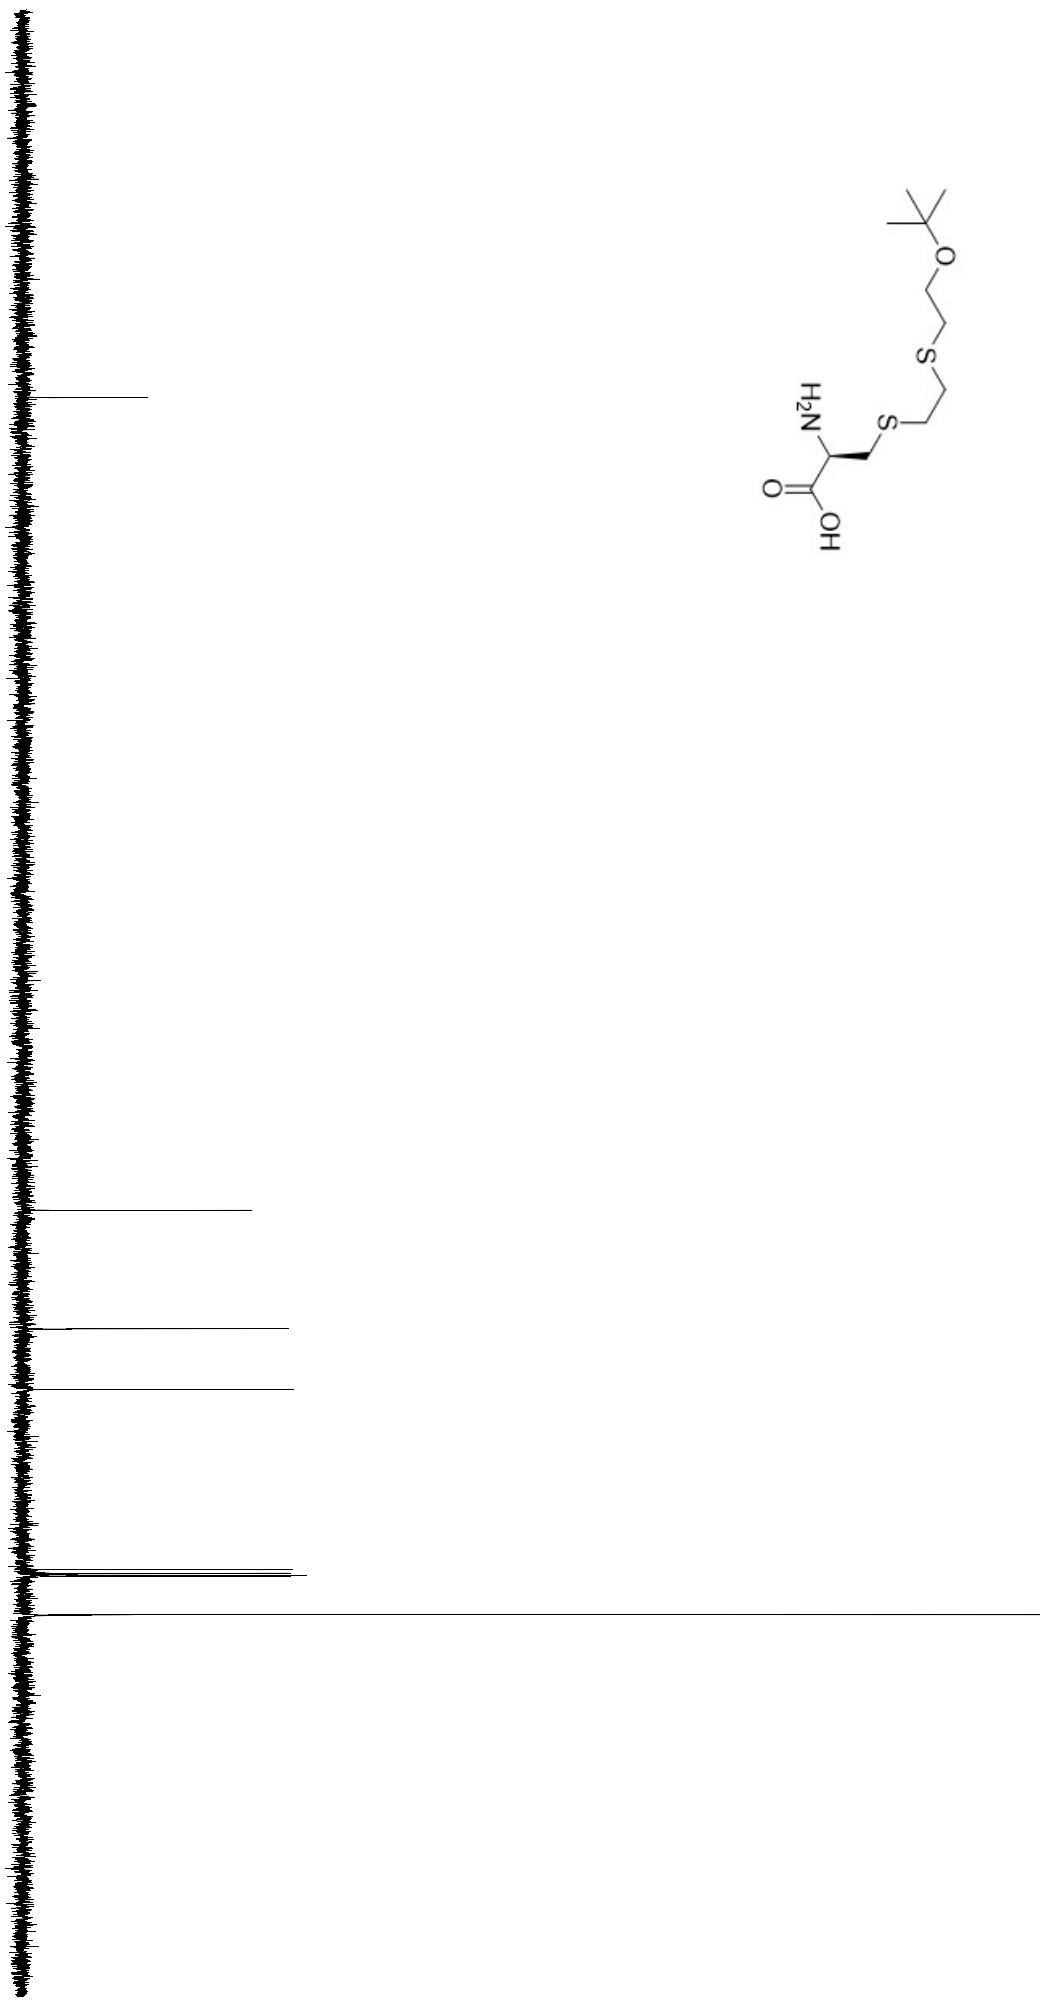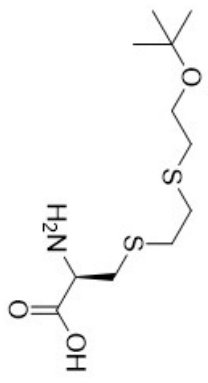

172.78

75.16

60.89

53.61

32.00  
31.54  
31.29  
31.14  
26.52

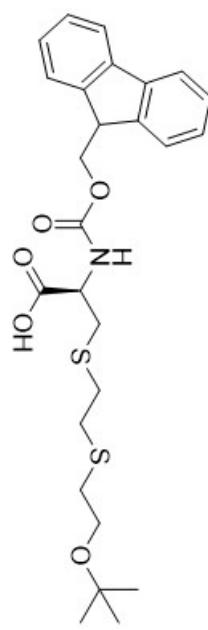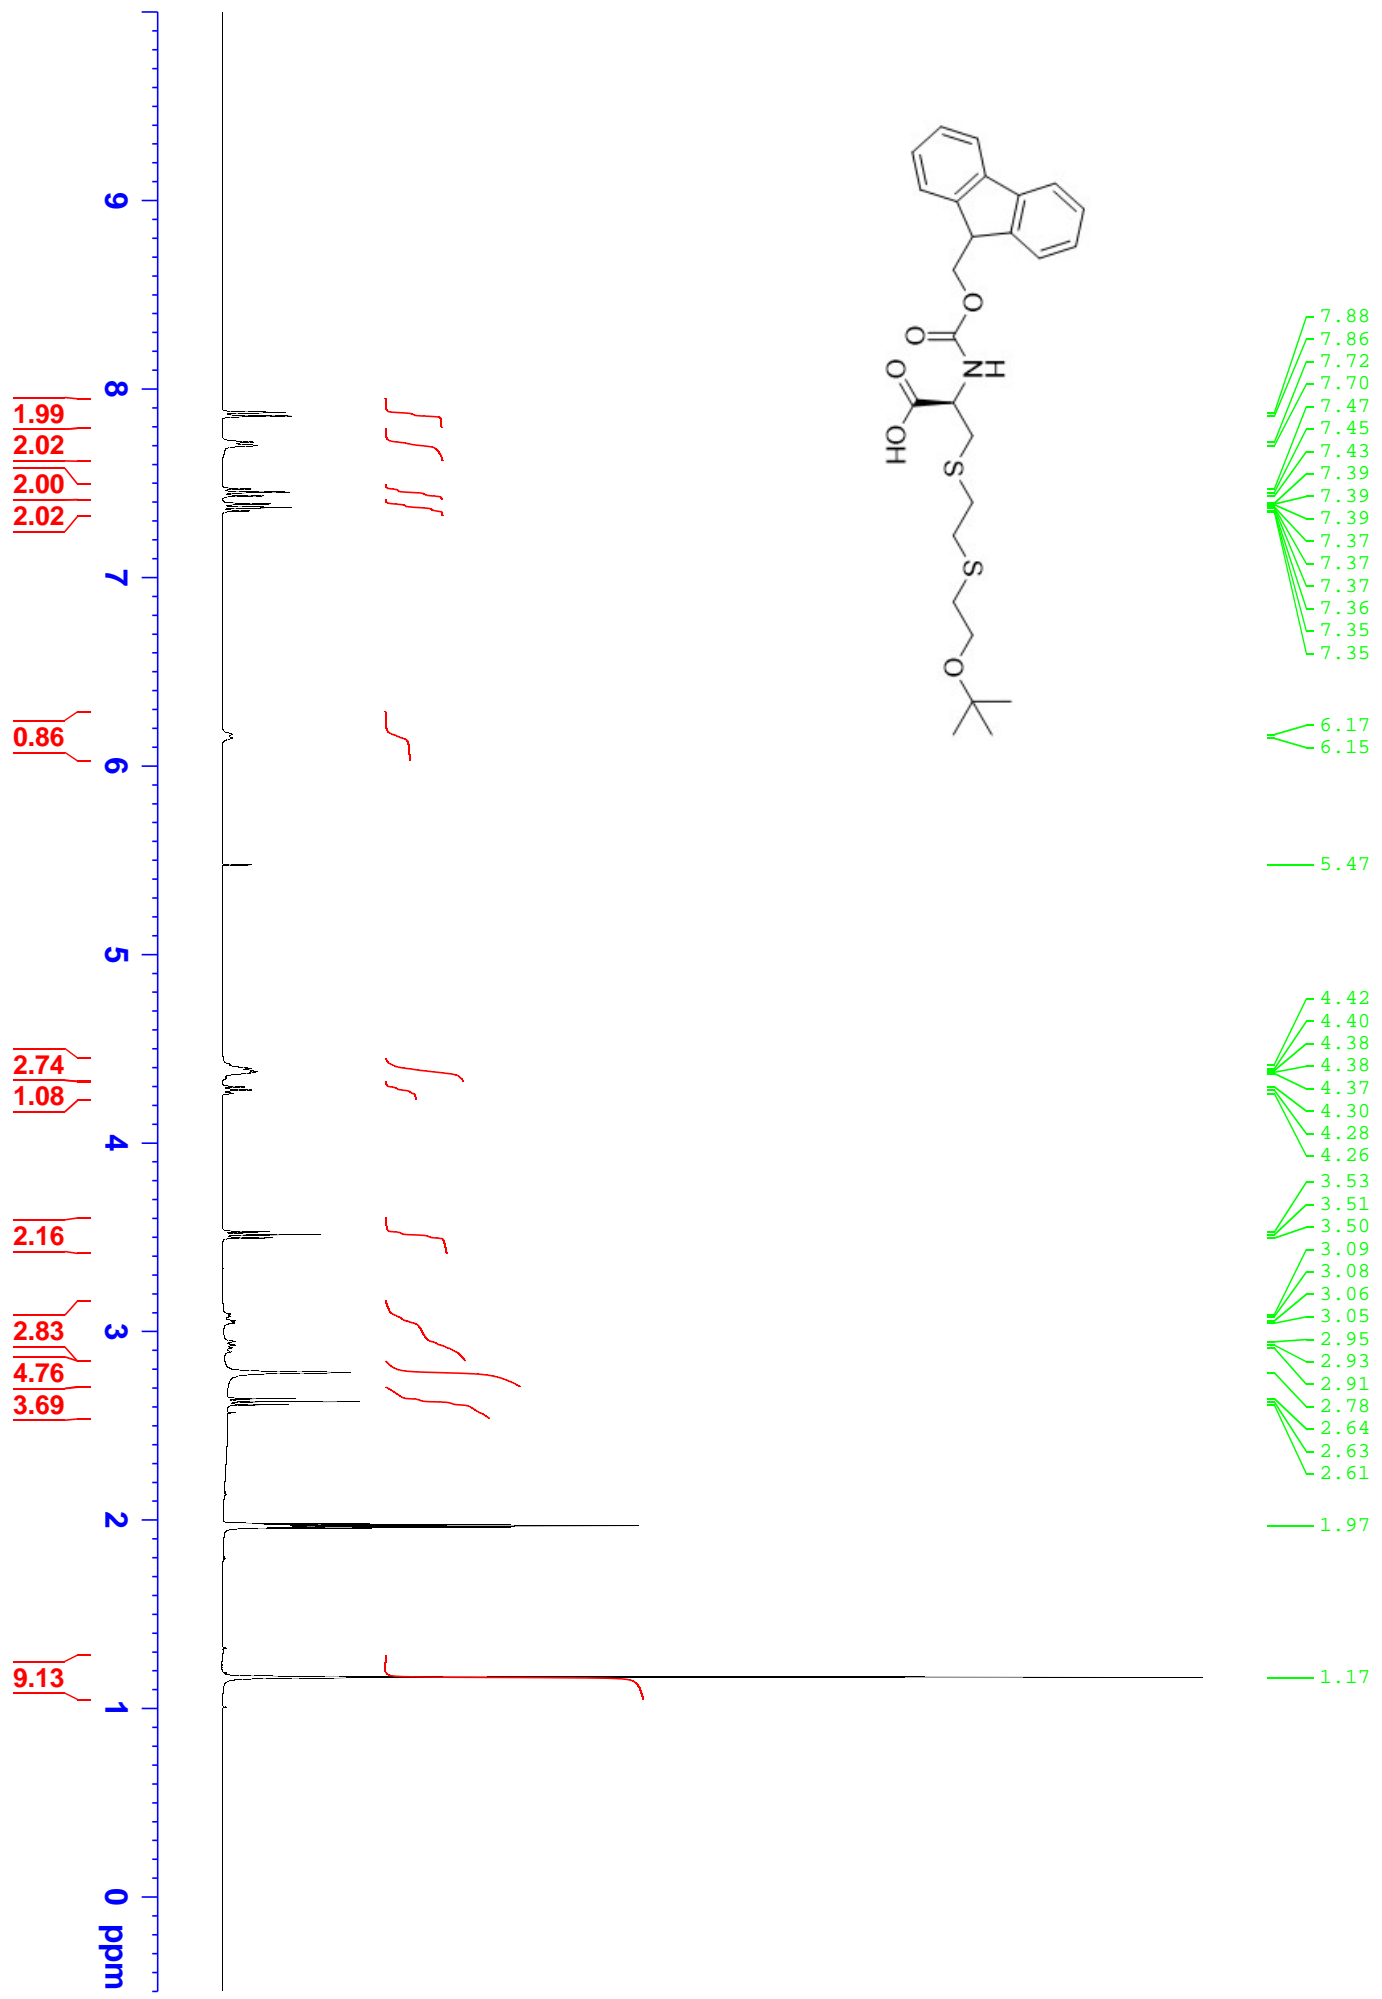

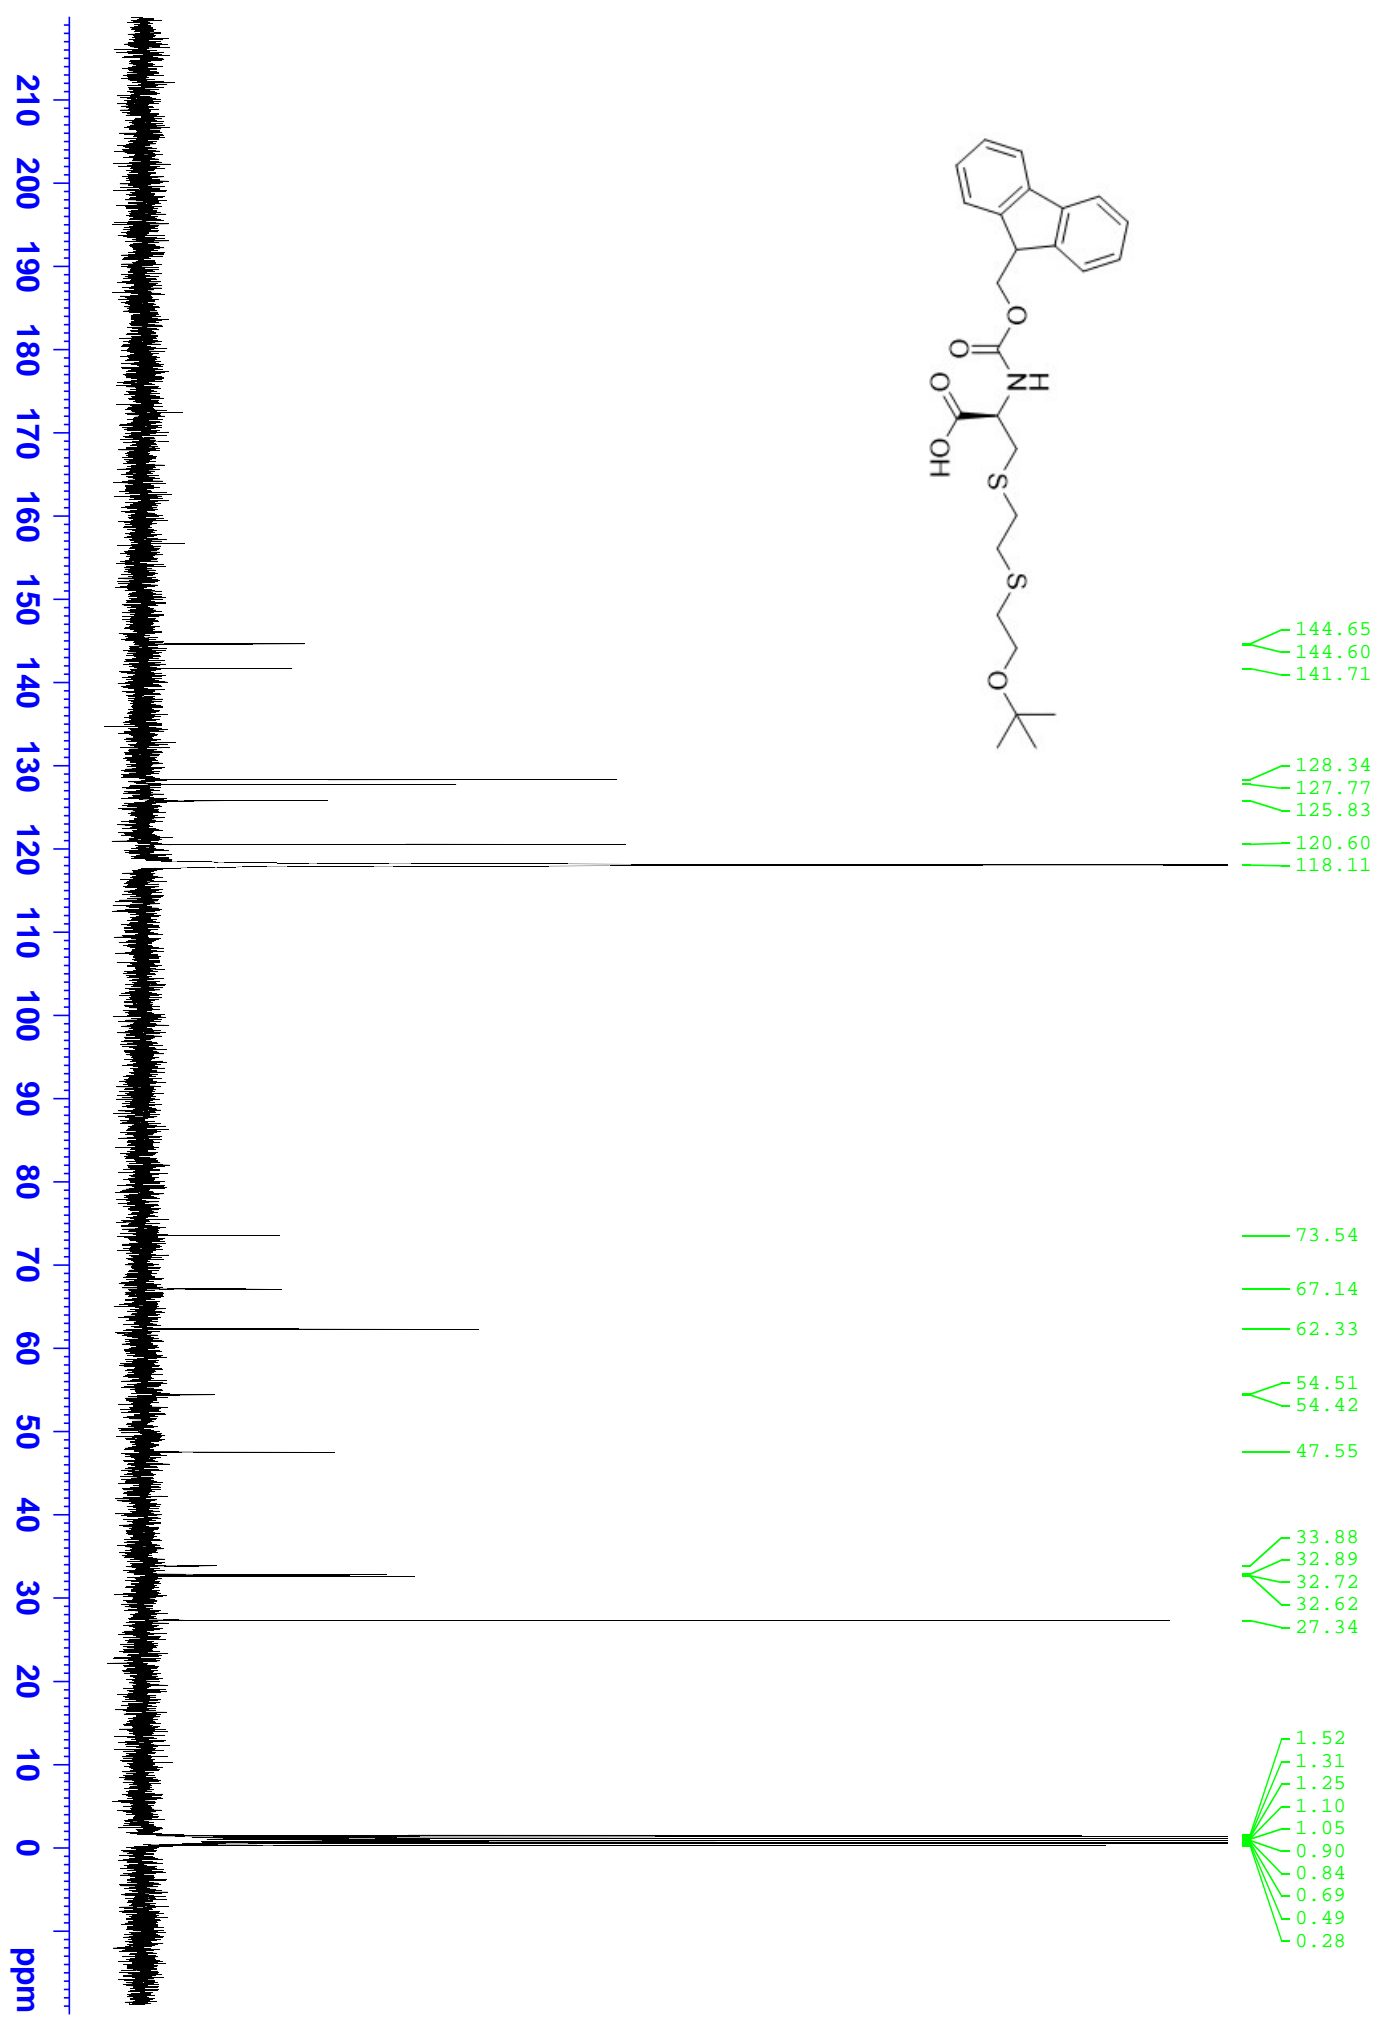

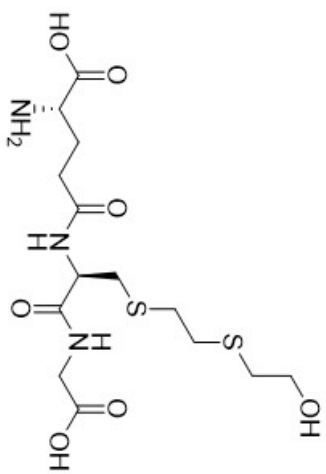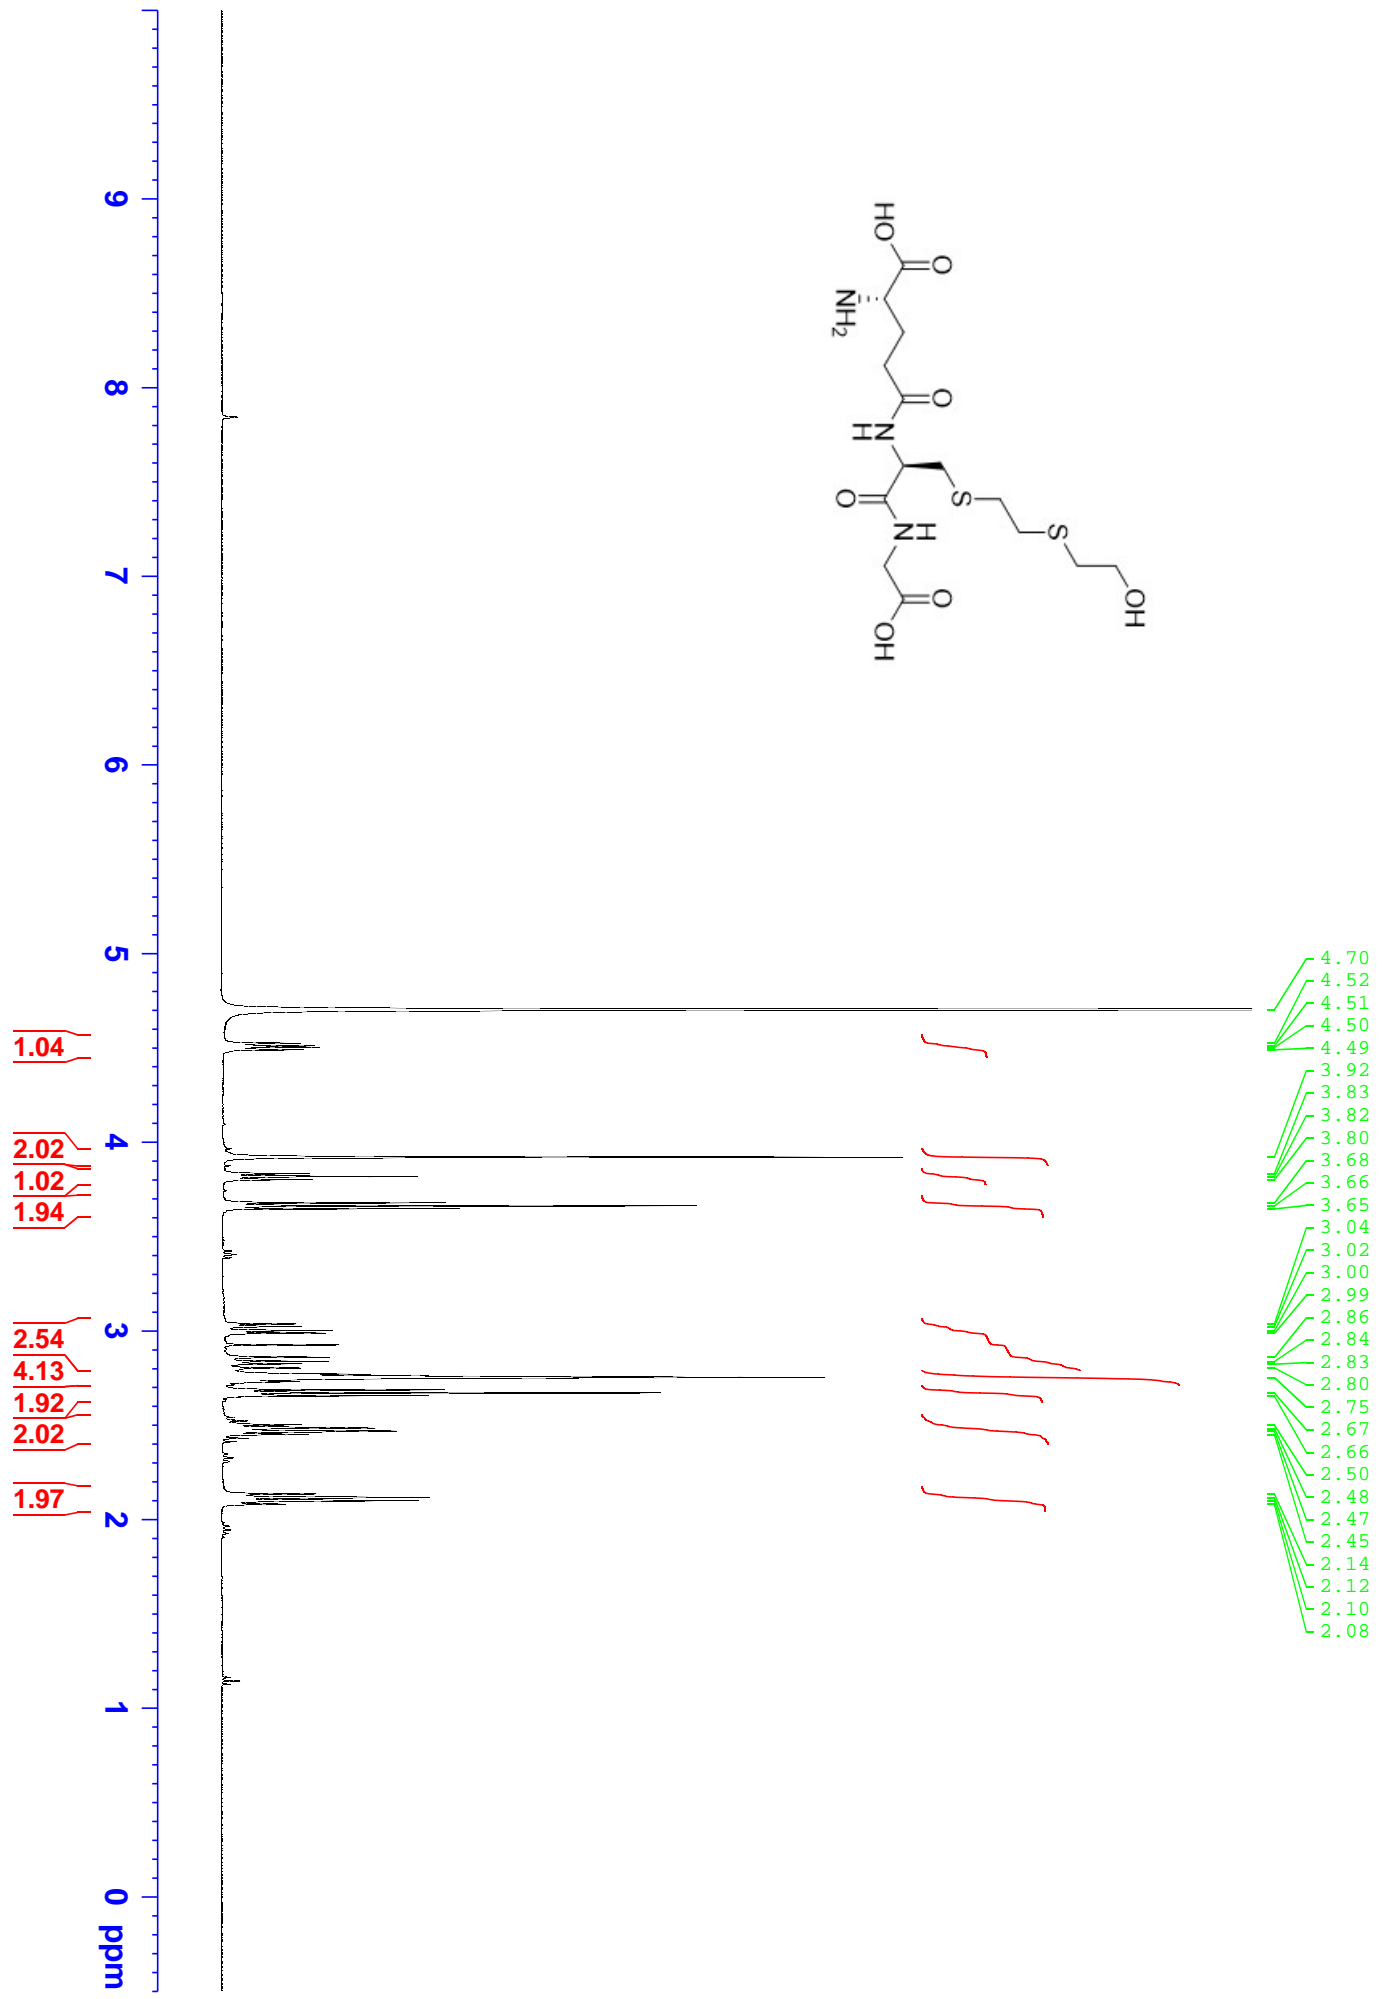

210 200 190 180 170 160 150 140 130 120 110 100 90 80 70 60 50 40 30 20 10 0 ppm

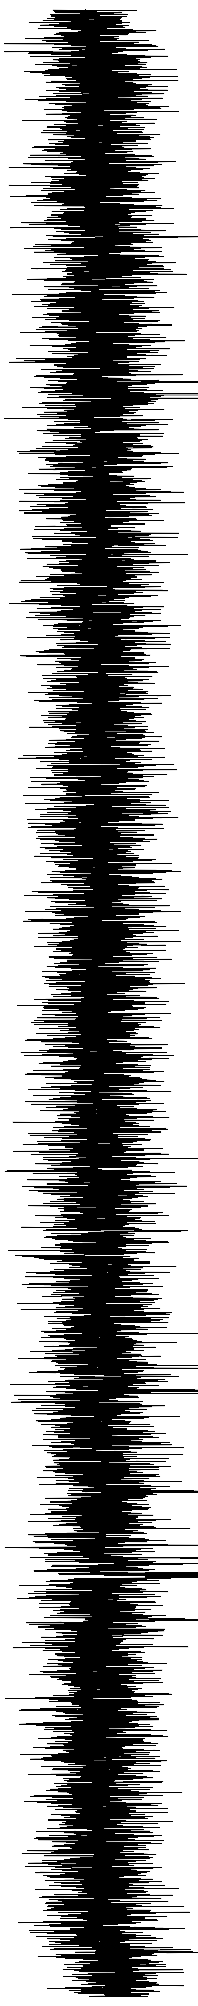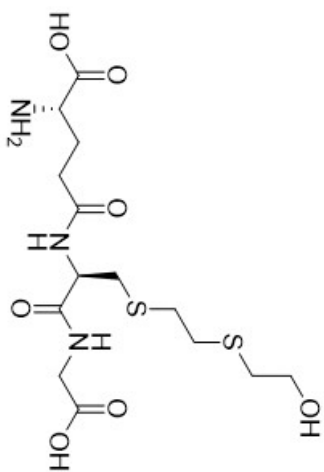

174.66  
173.14  
173.09  
172.71

60.30  
53.39  
53.14

41.26  
33.32  
32.69  
31.57  
31.10  
31.00  
25.88

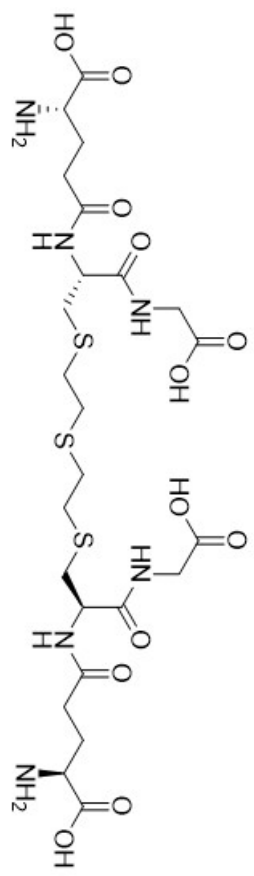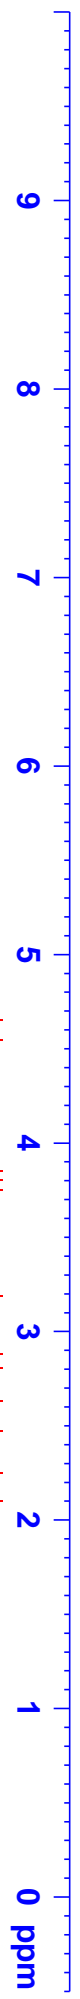

2.00  
3.67  
2.35  
4.80  
7.65  
4.16  
4.04

4.79  
4.62  
4.61  
4.60  
4.59  
3.82  
3.81  
3.80  
3.79  
3.77  
3.35  
3.15  
3.13  
3.11  
3.10  
2.94  
2.92  
2.91  
2.89  
2.85  
2.57  
2.56  
2.55  
2.54  
2.54  
2.53  
2.21  
2.20  
2.18  
2.16  
2.14



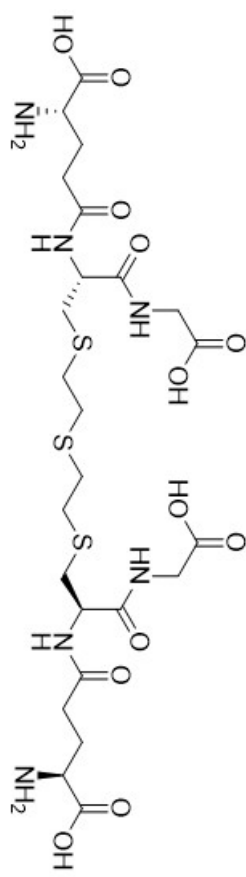

175.71  
174.87  
173.90  
172.01

54.07  
53.14  
48.85  
43.03  
32.84  
31.52  
31.37  
30.95  
26.17

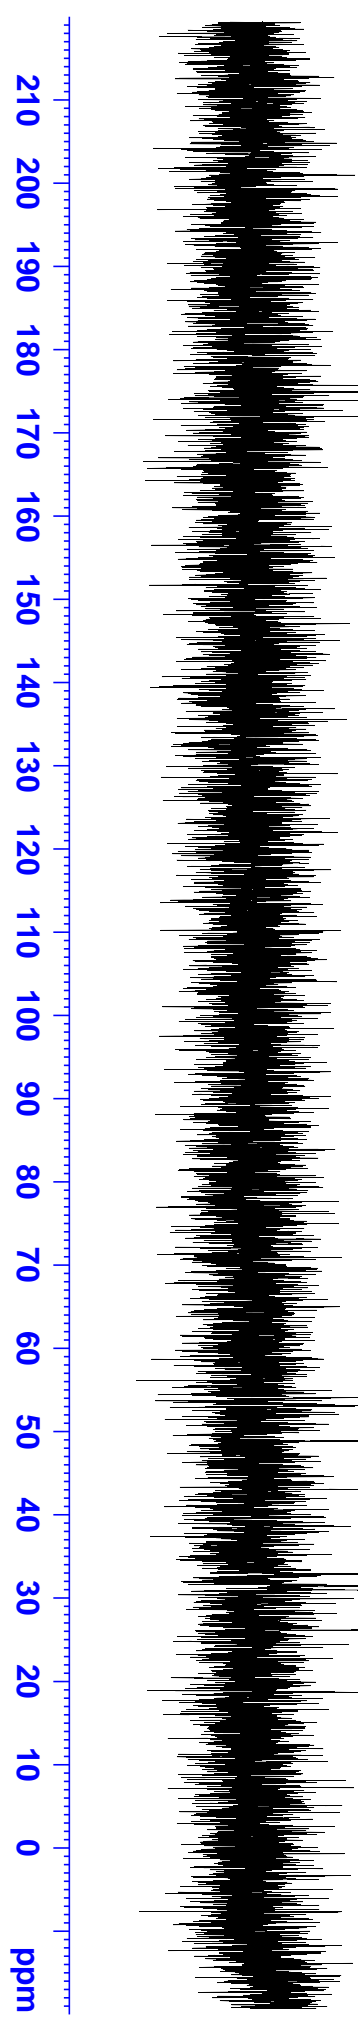

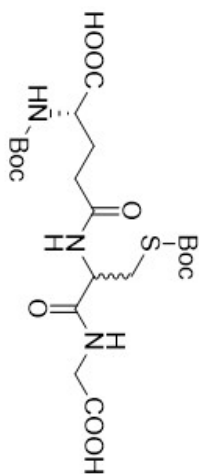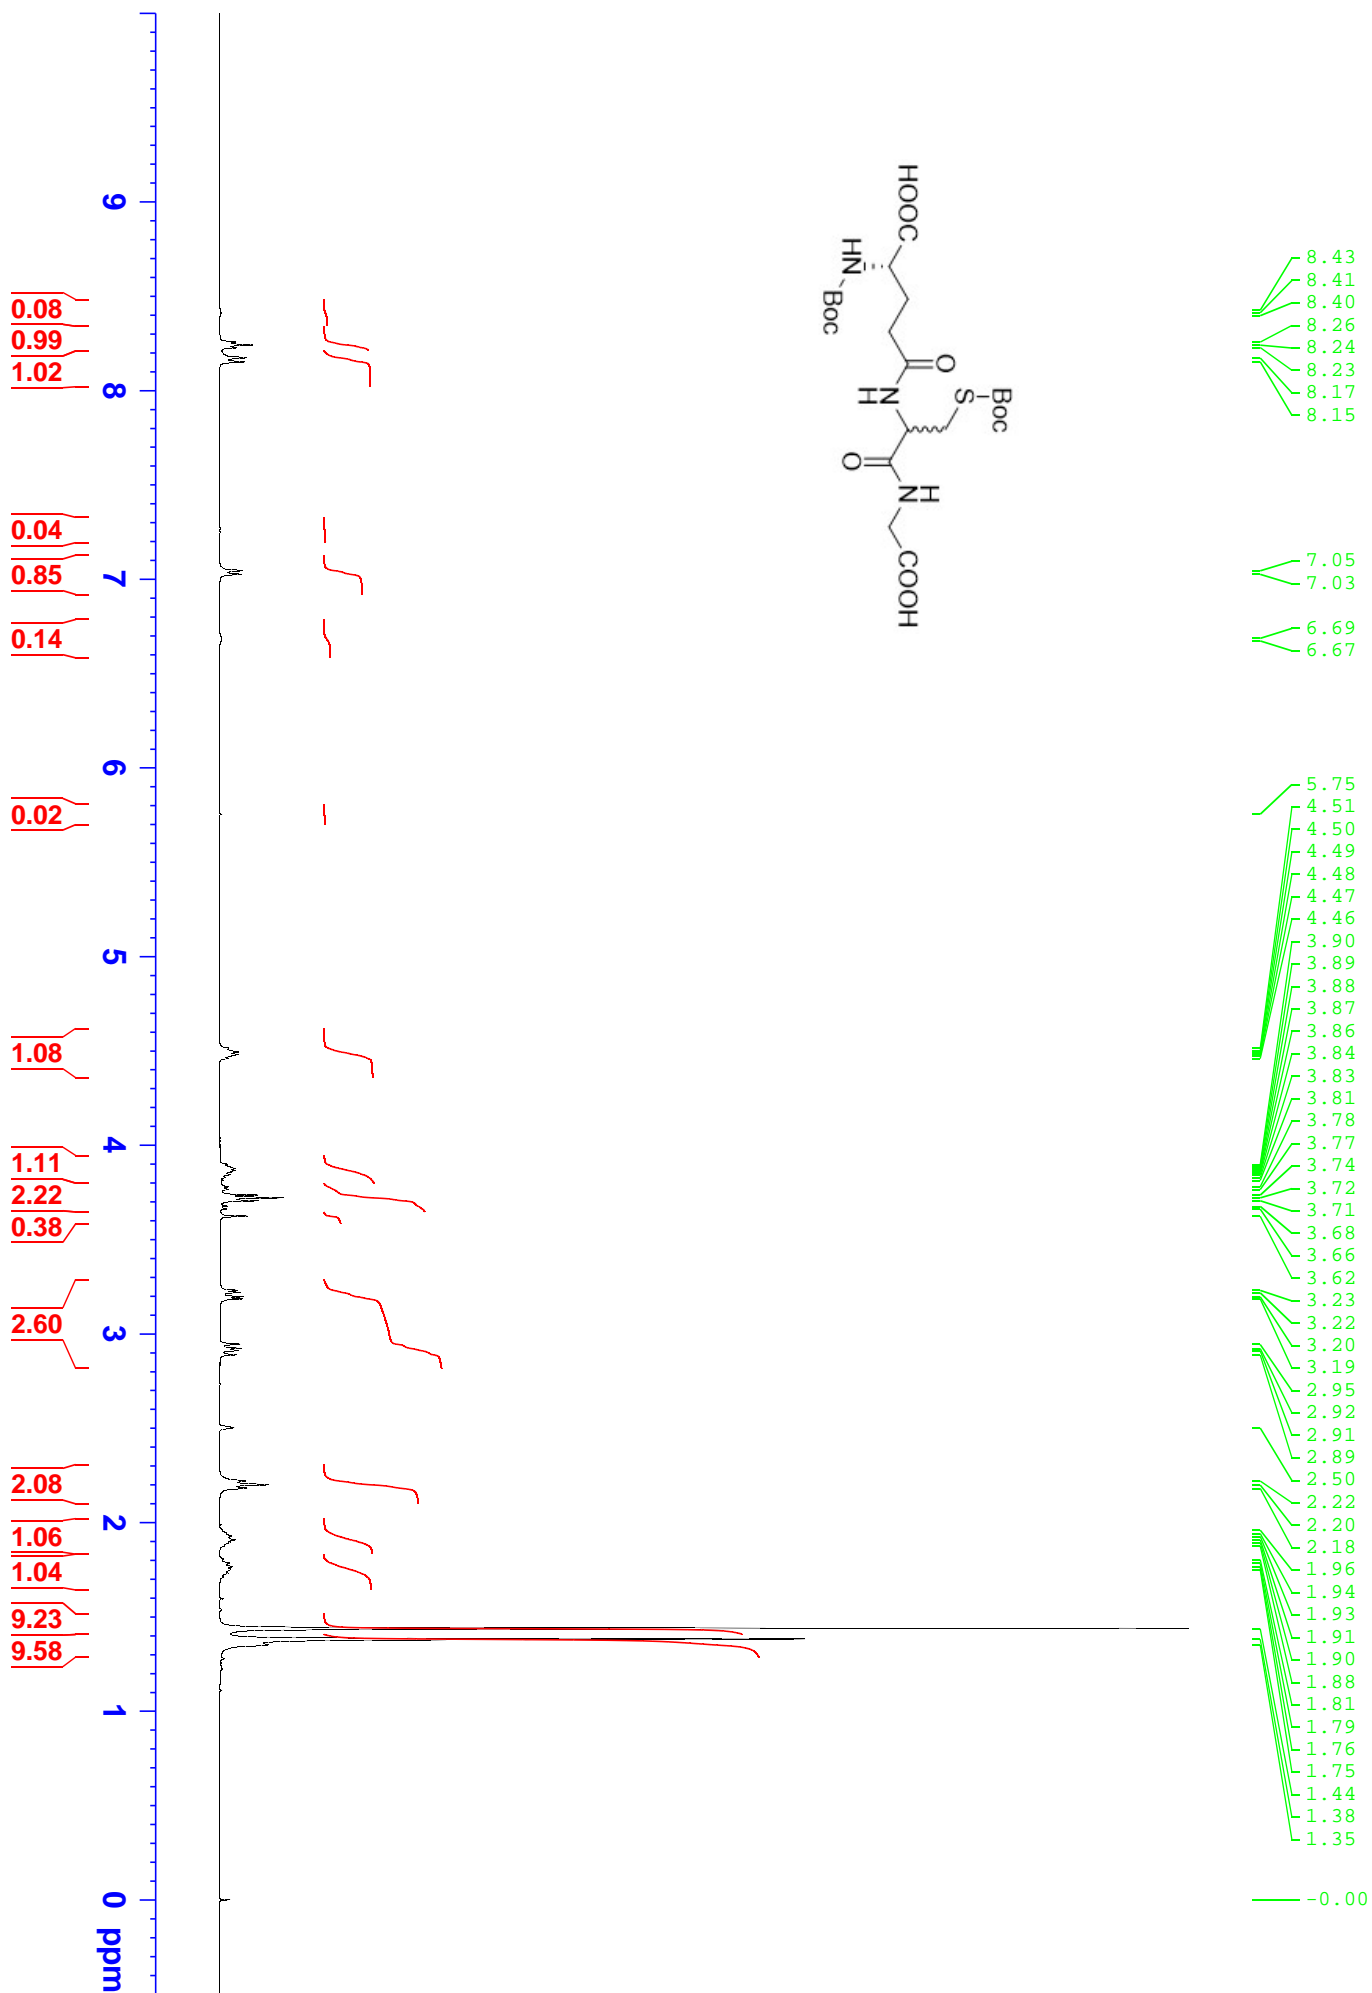

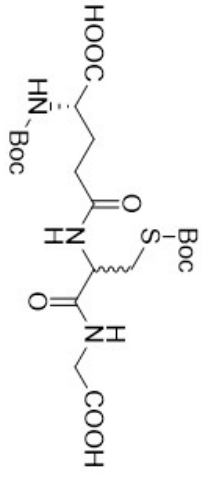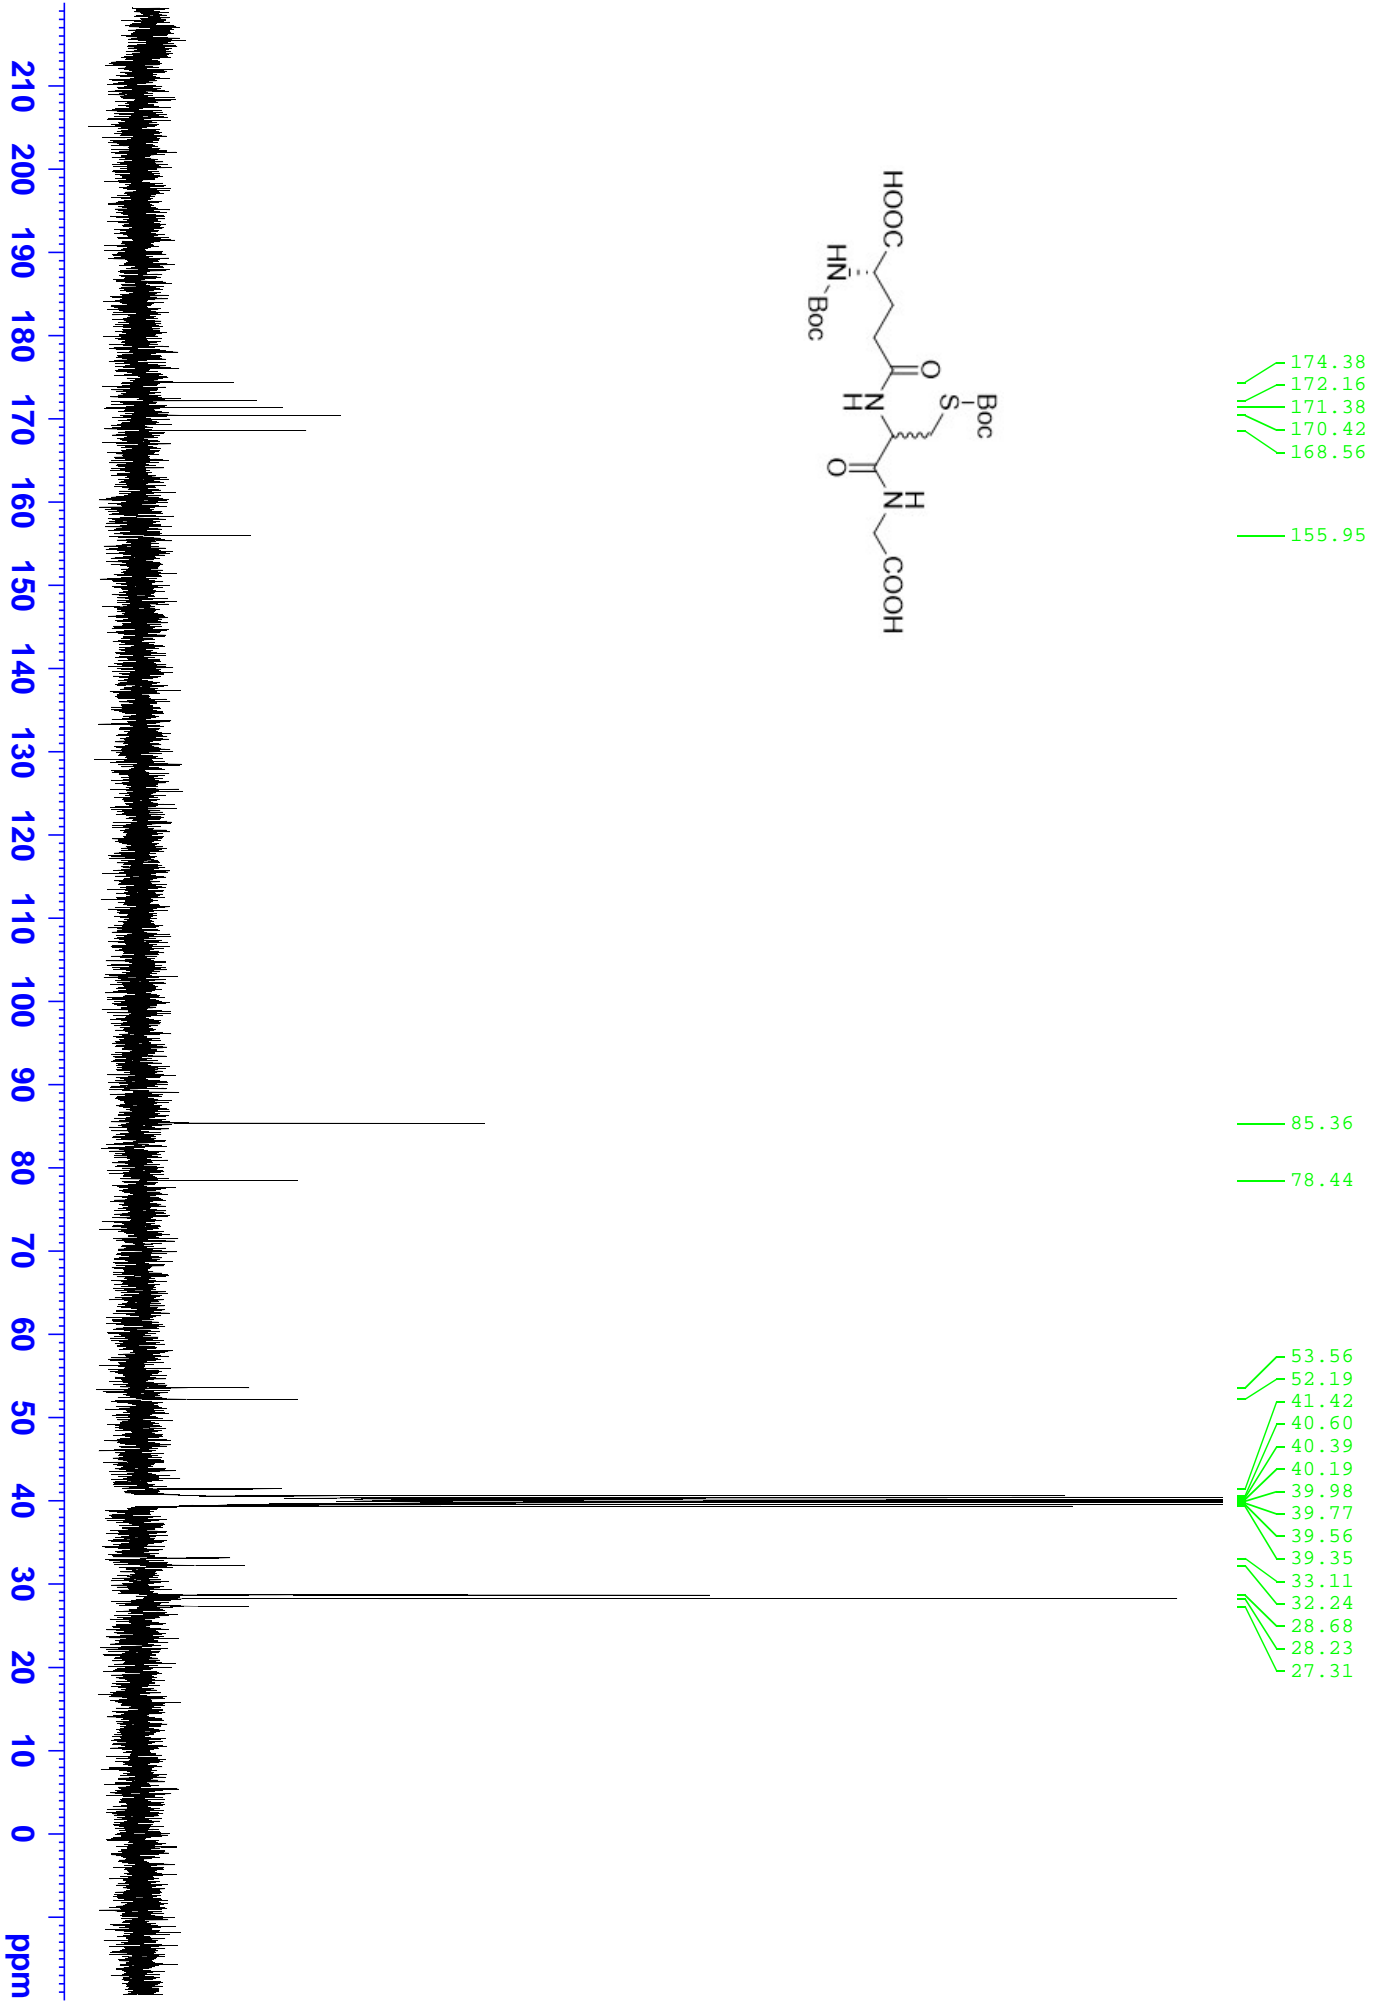

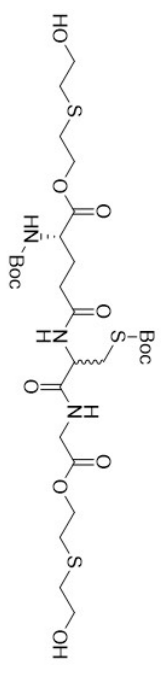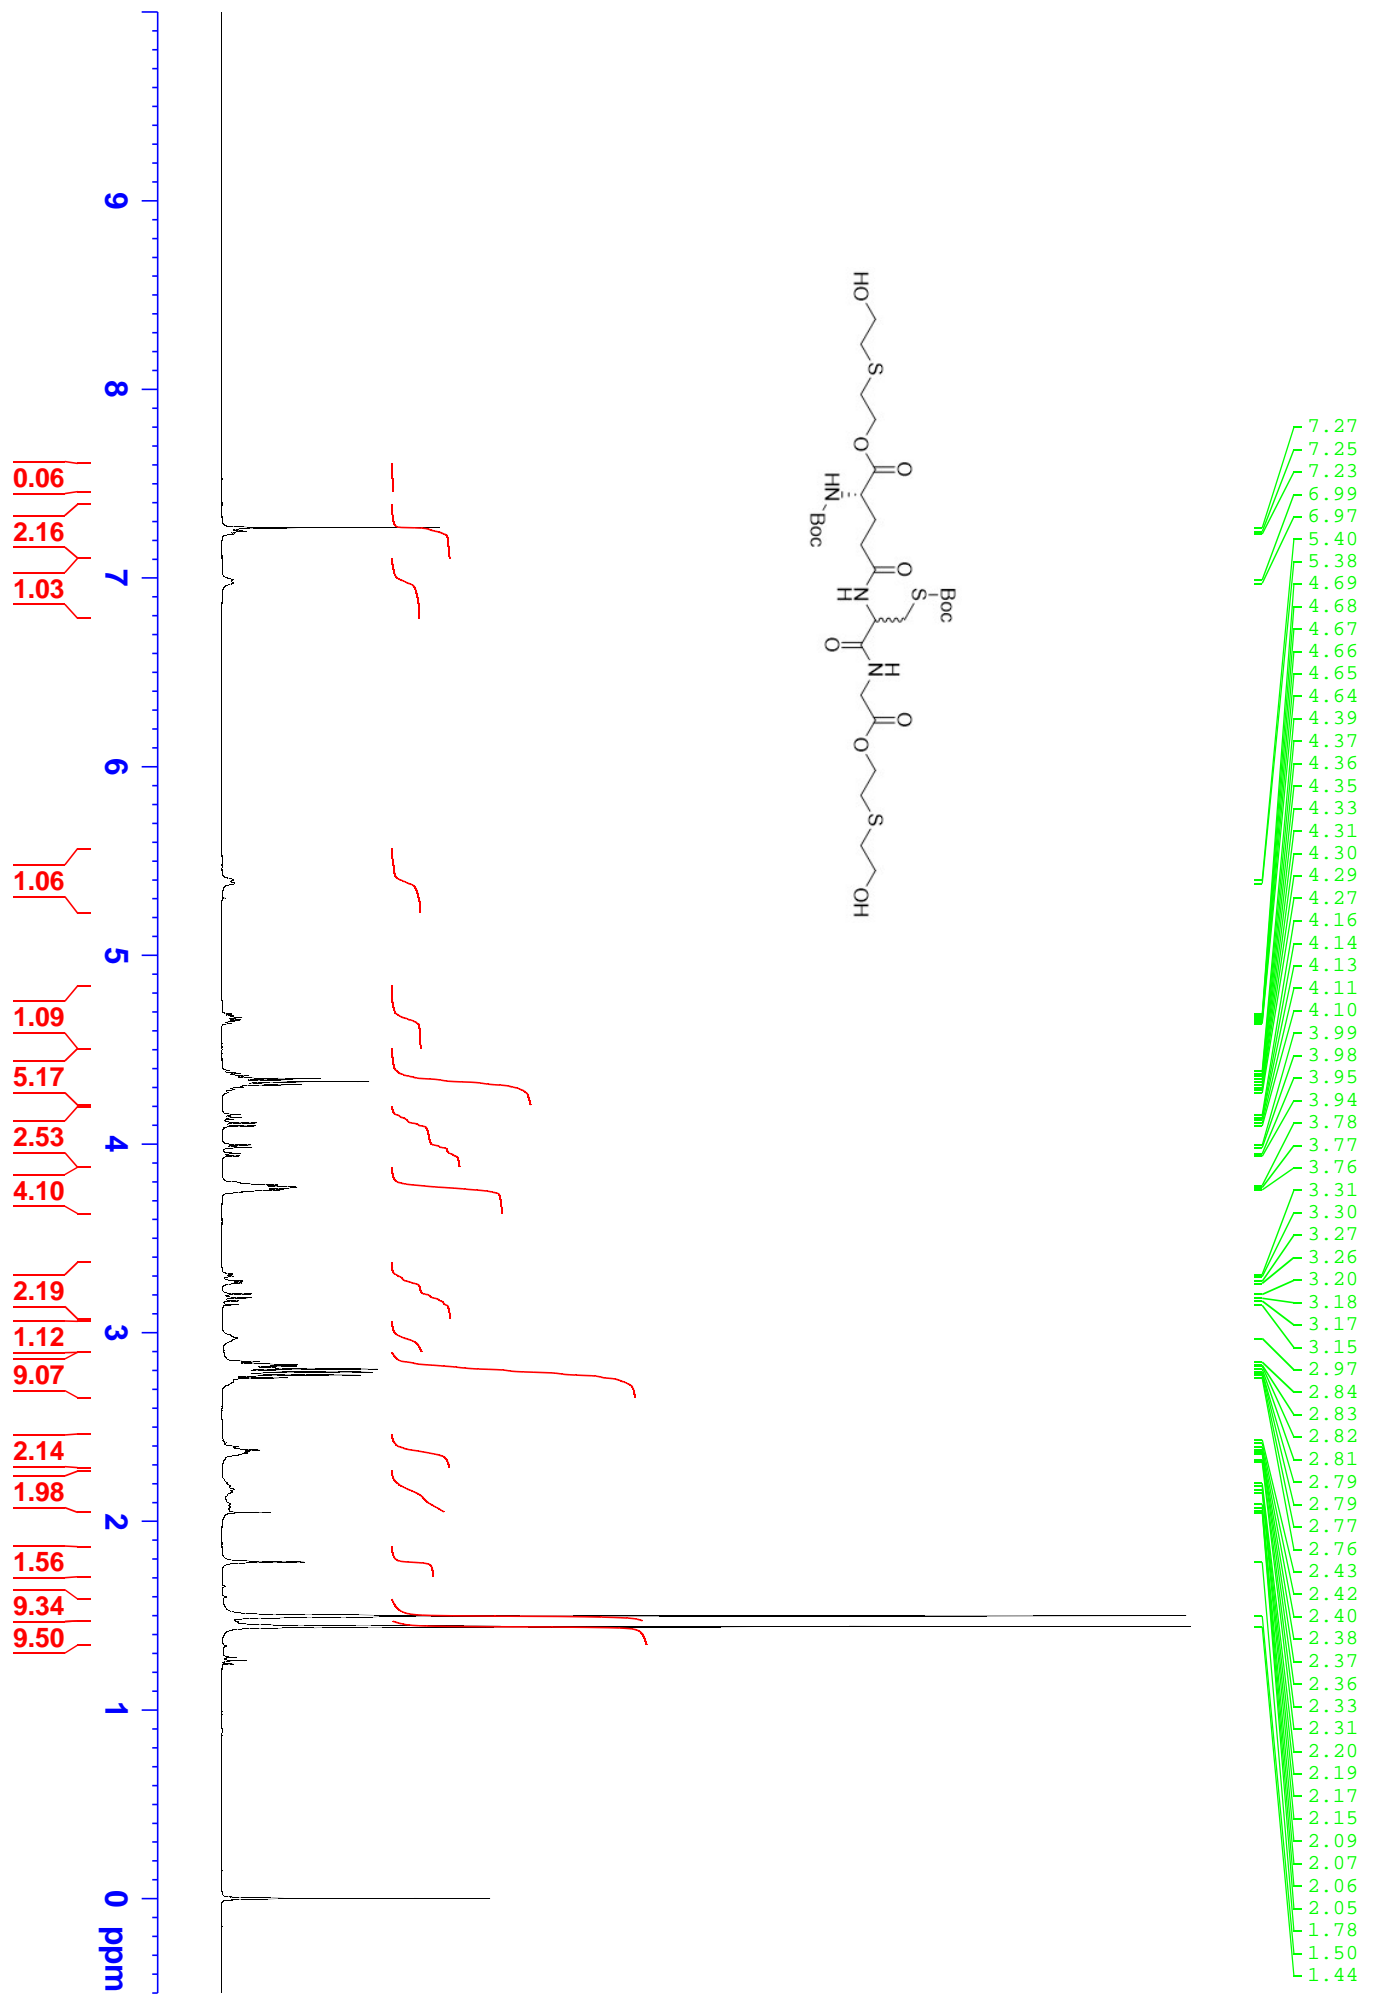

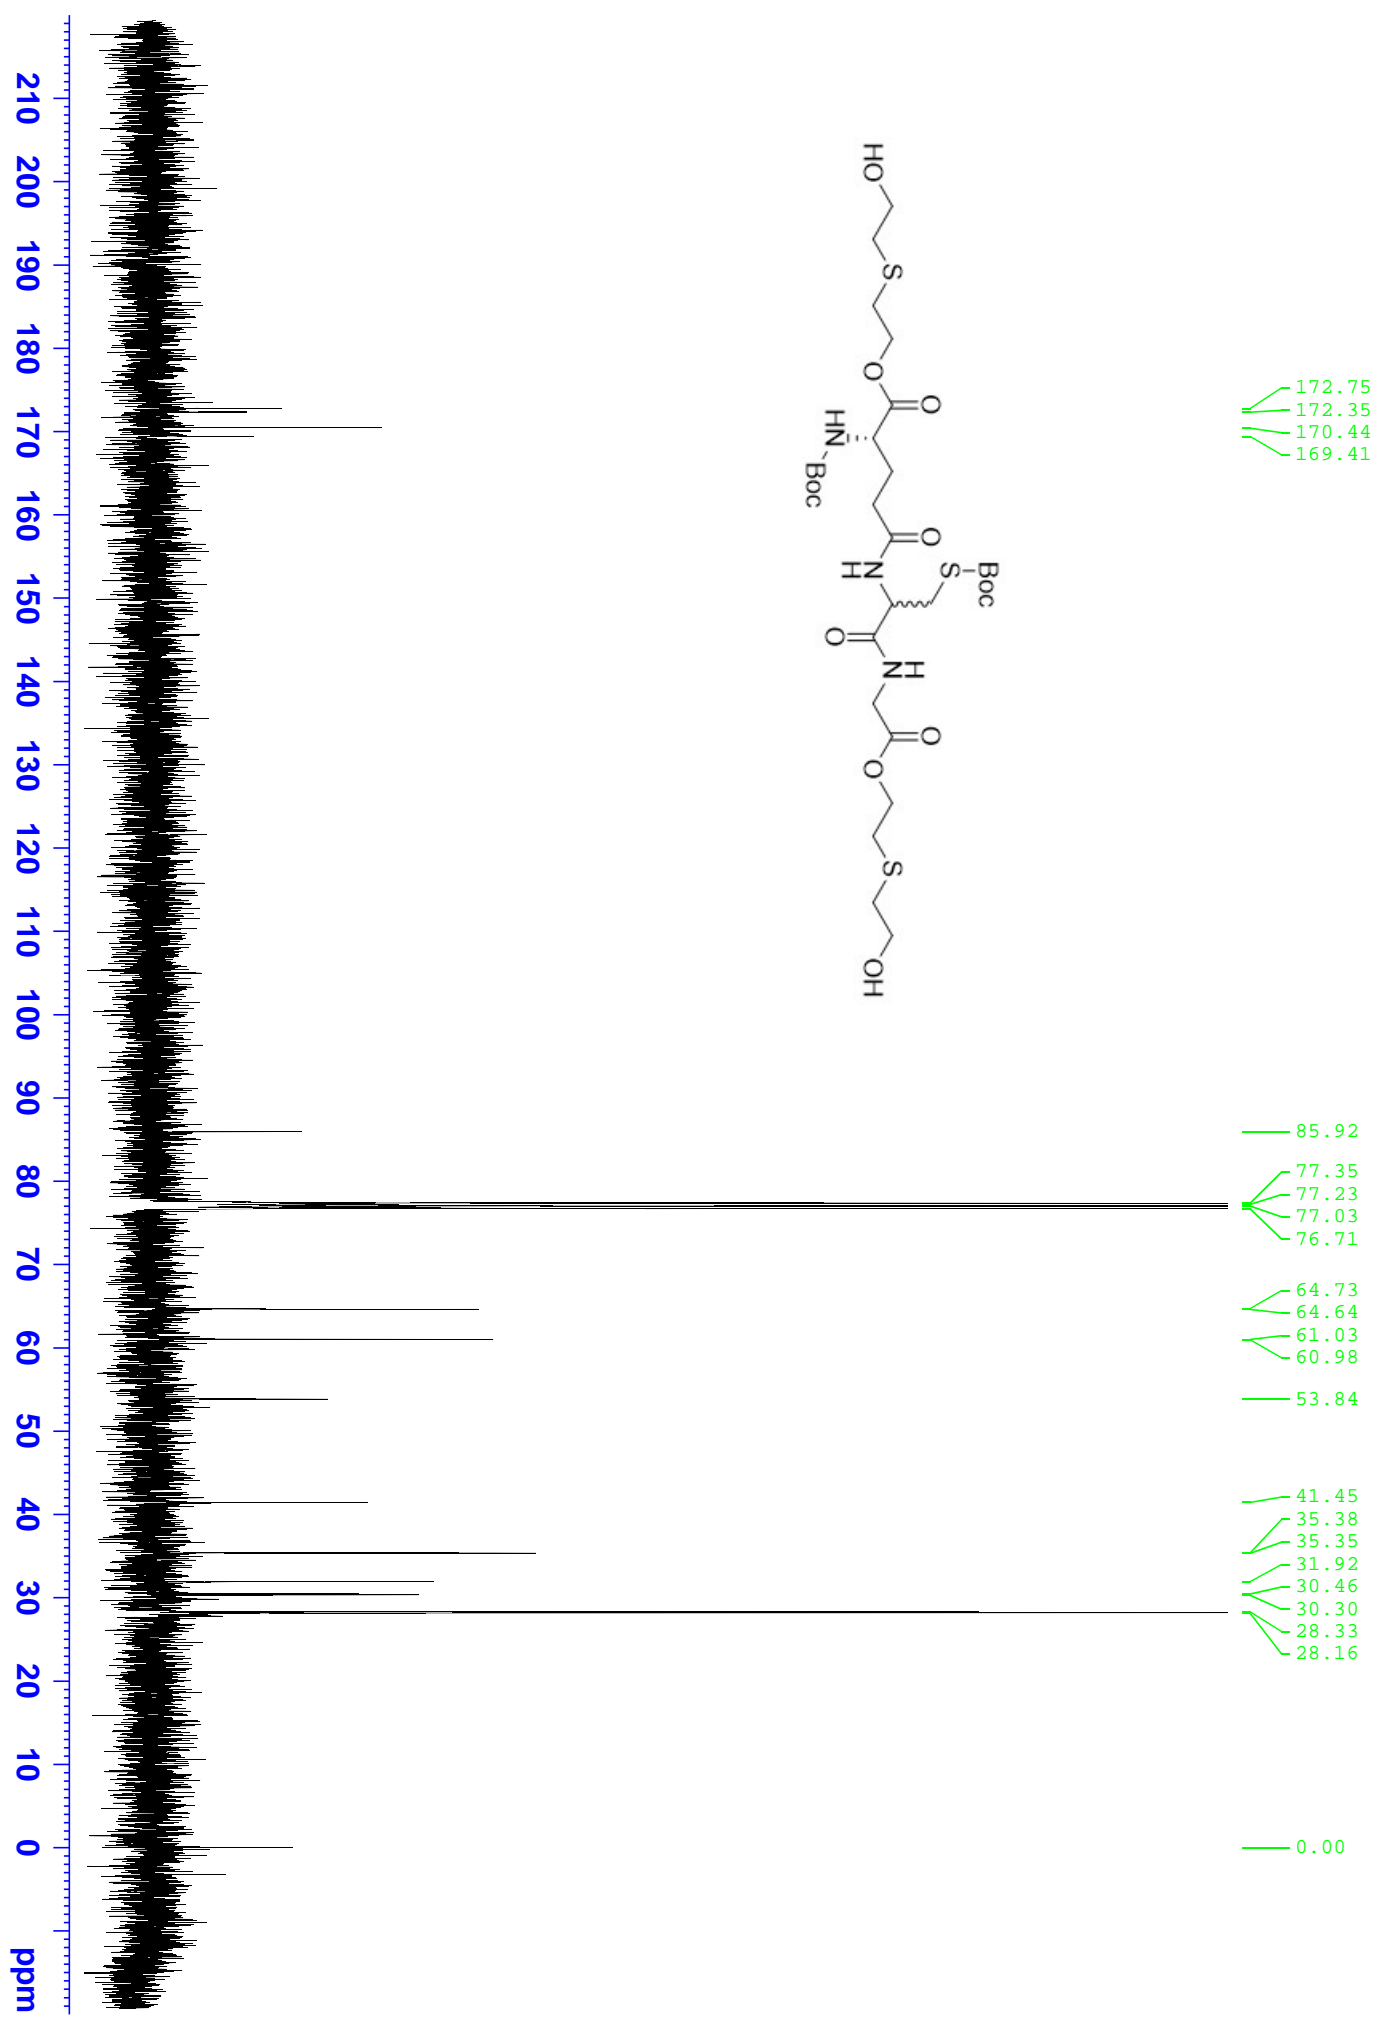

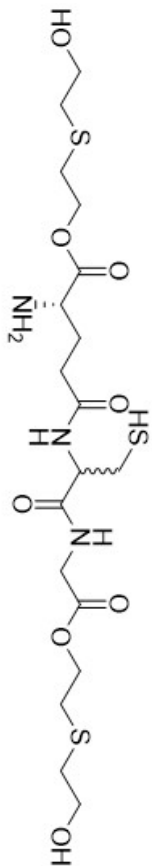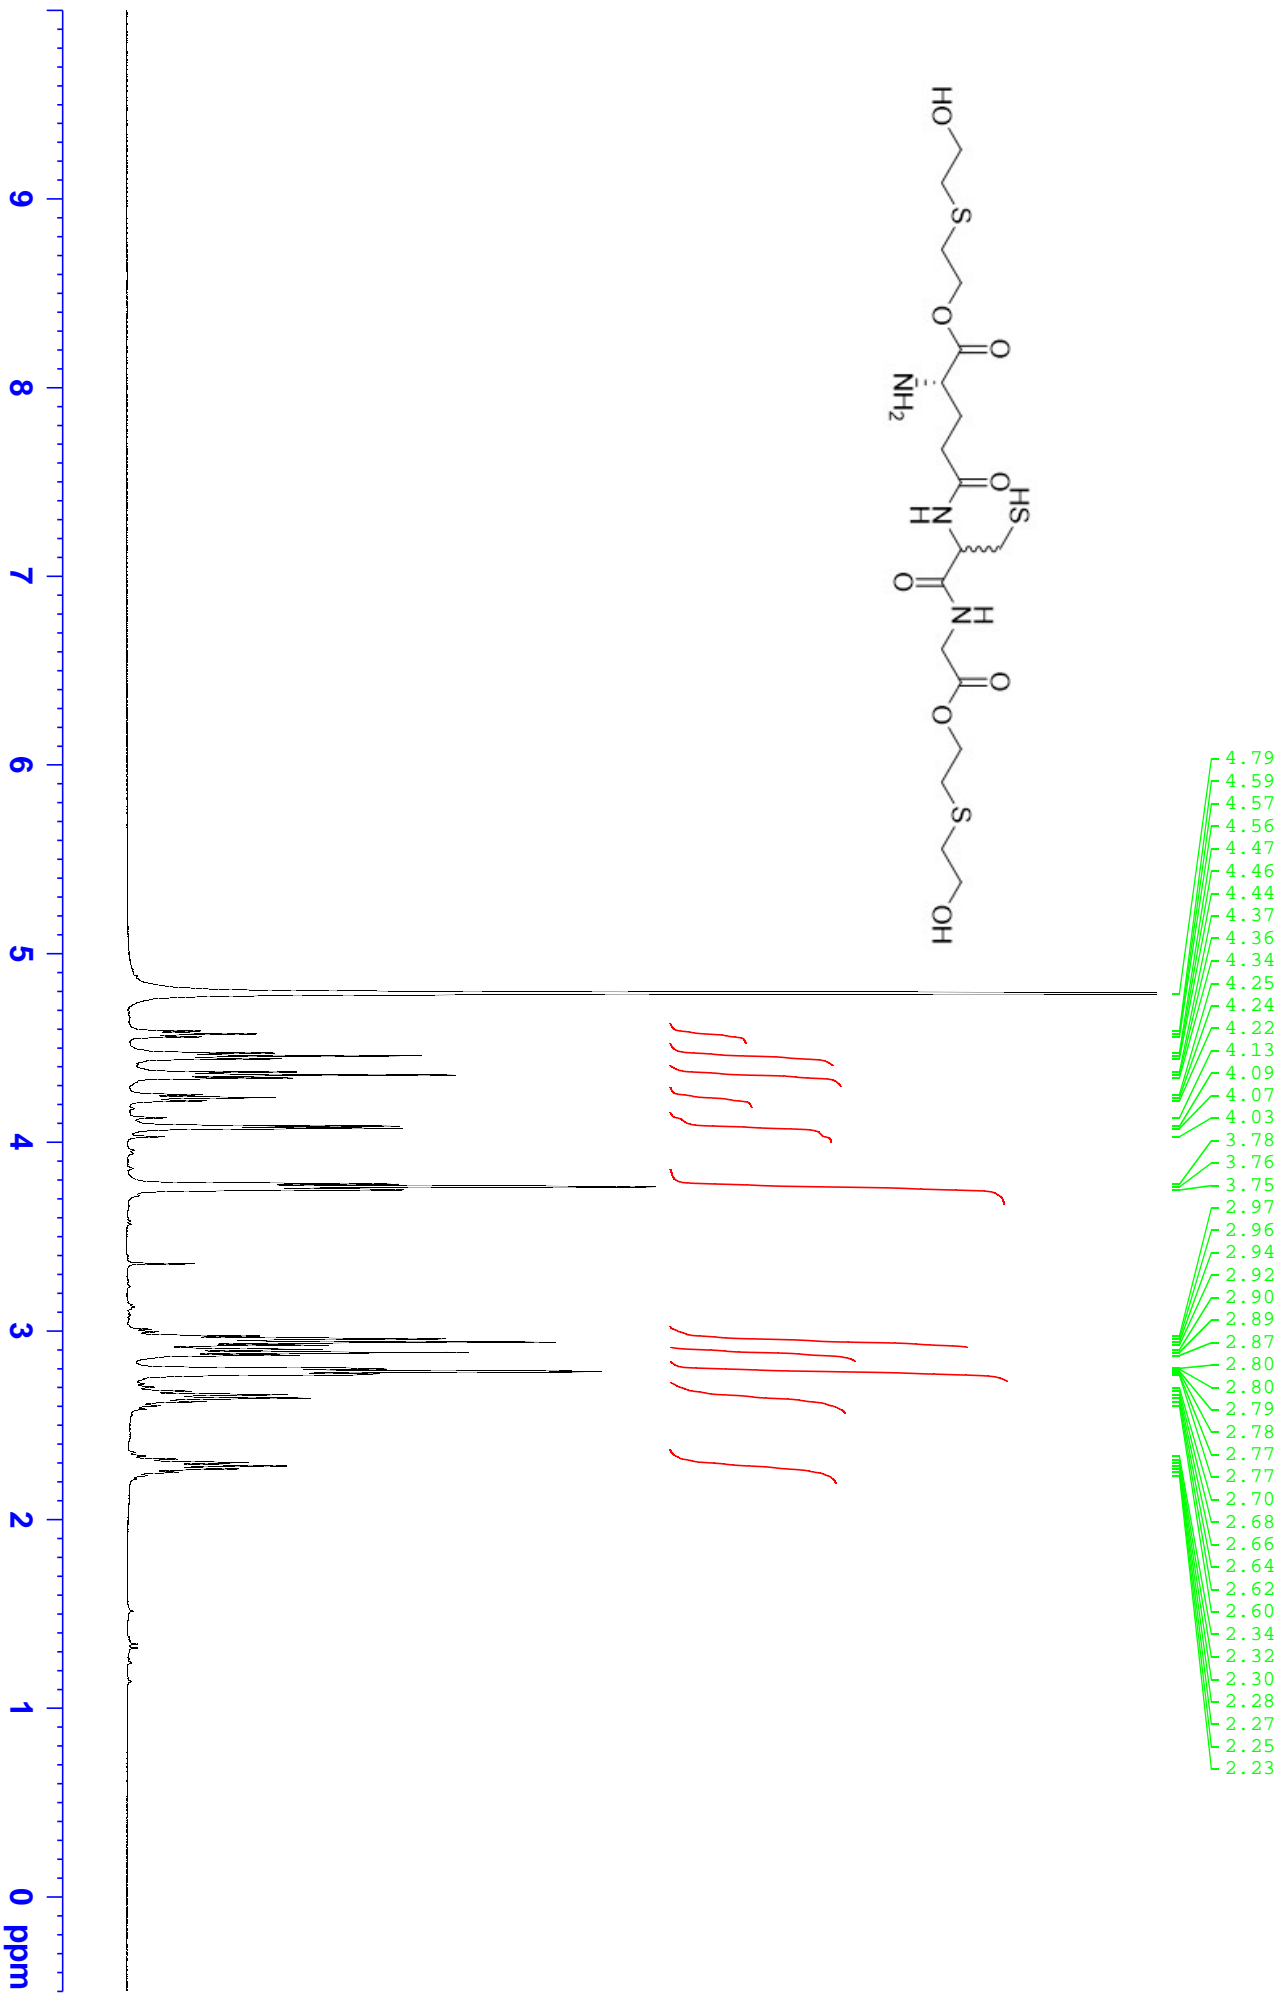

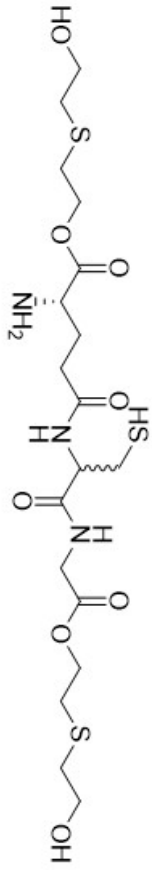

174.09  
172.49  
171.03  
169.49

65.30  
64.70  
60.29  
55.53  
52.15

41.31  
33.62  
33.54  
30.64  
29.69  
29.66  
25.41  
25.31

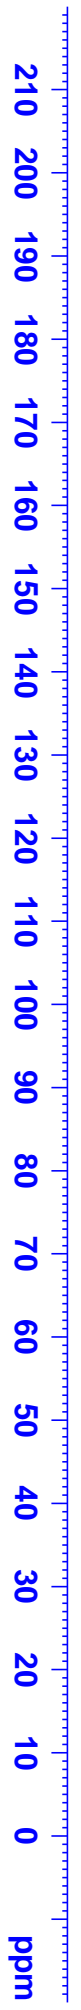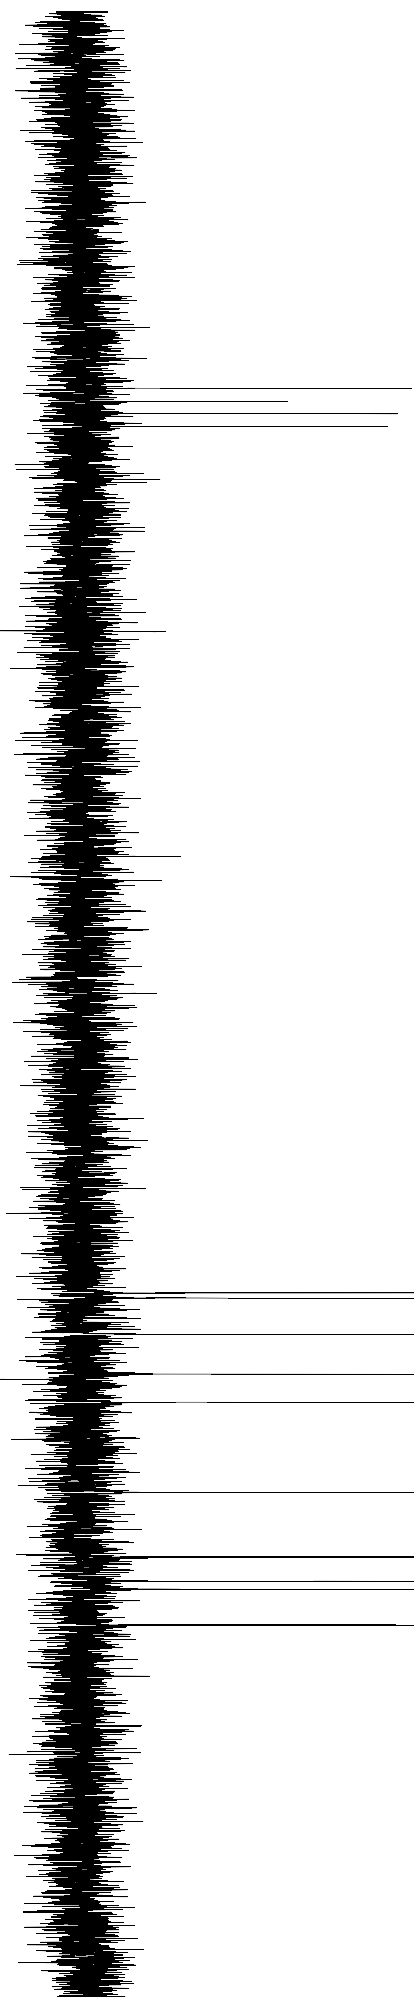

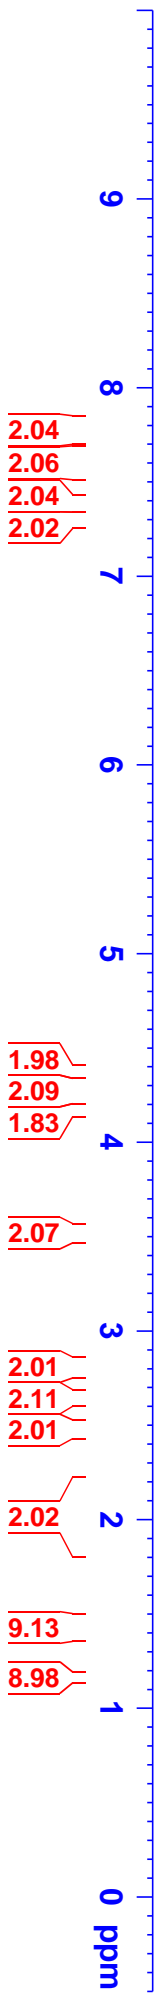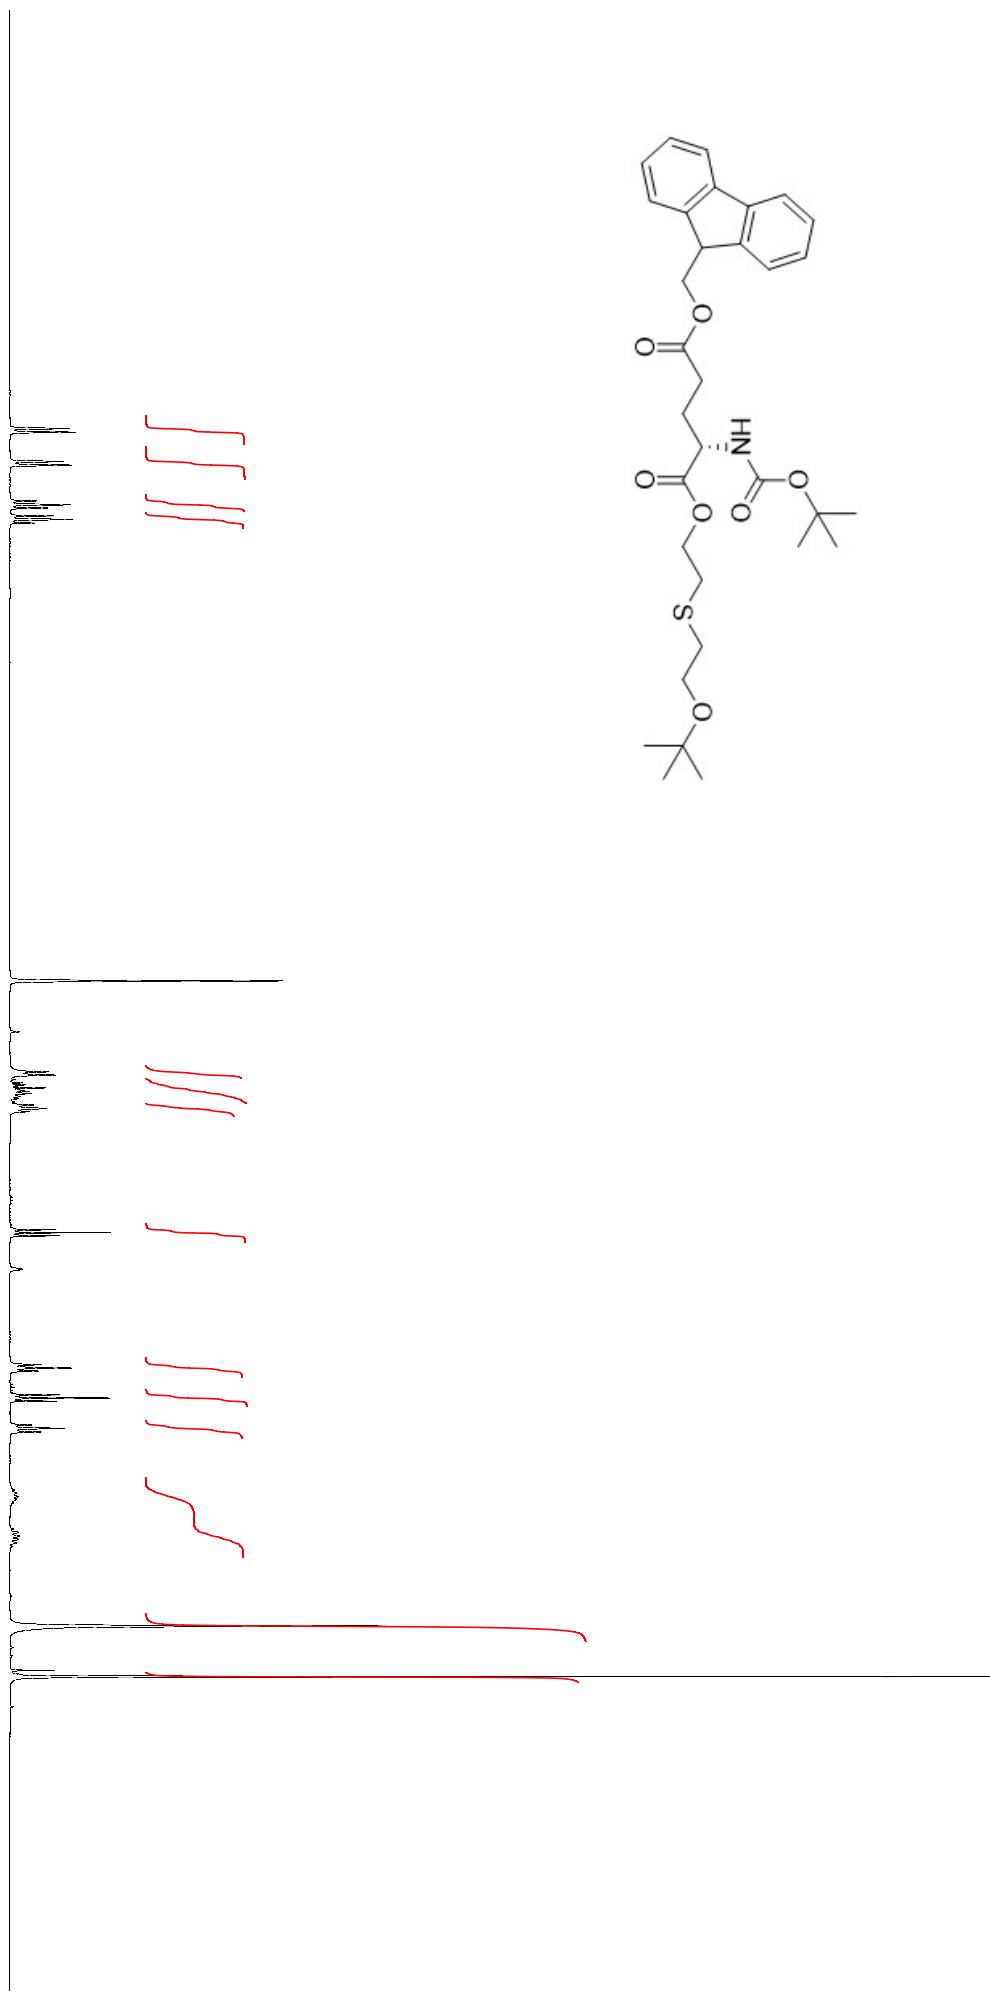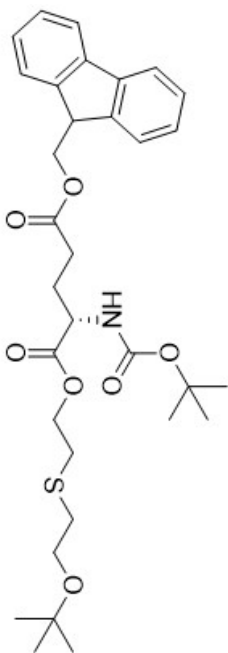

- 7.78
- 7.76
- 7.61
- 7.59
- 7.40
- 7.38
- 7.36
- 7.32
- 7.30
- 7.28

- 4.86
- 4.37
- 4.36
- 4.31
- 4.30
- 4.29
- 4.27
- 4.27
- 4.26
- 4.24
- 4.20
- 4.18
- 4.16
- 3.54
- 3.52
- 3.50
- 2.82
- 2.80
- 2.79
- 2.66
- 2.64
- 2.63
- 2.50
- 2.48
- 2.46
- 2.16
- 2.14
- 2.12
- 2.11
- 2.09
- 1.95
- 1.93
- 1.91
- 1.90
- 1.89
- 1.87
- 1.86
- 1.44
- 1.17



210 200 190 180 170 160 150 140 130 120 110 100 90 80 70 60 50 40 30 20 10 0 ppm

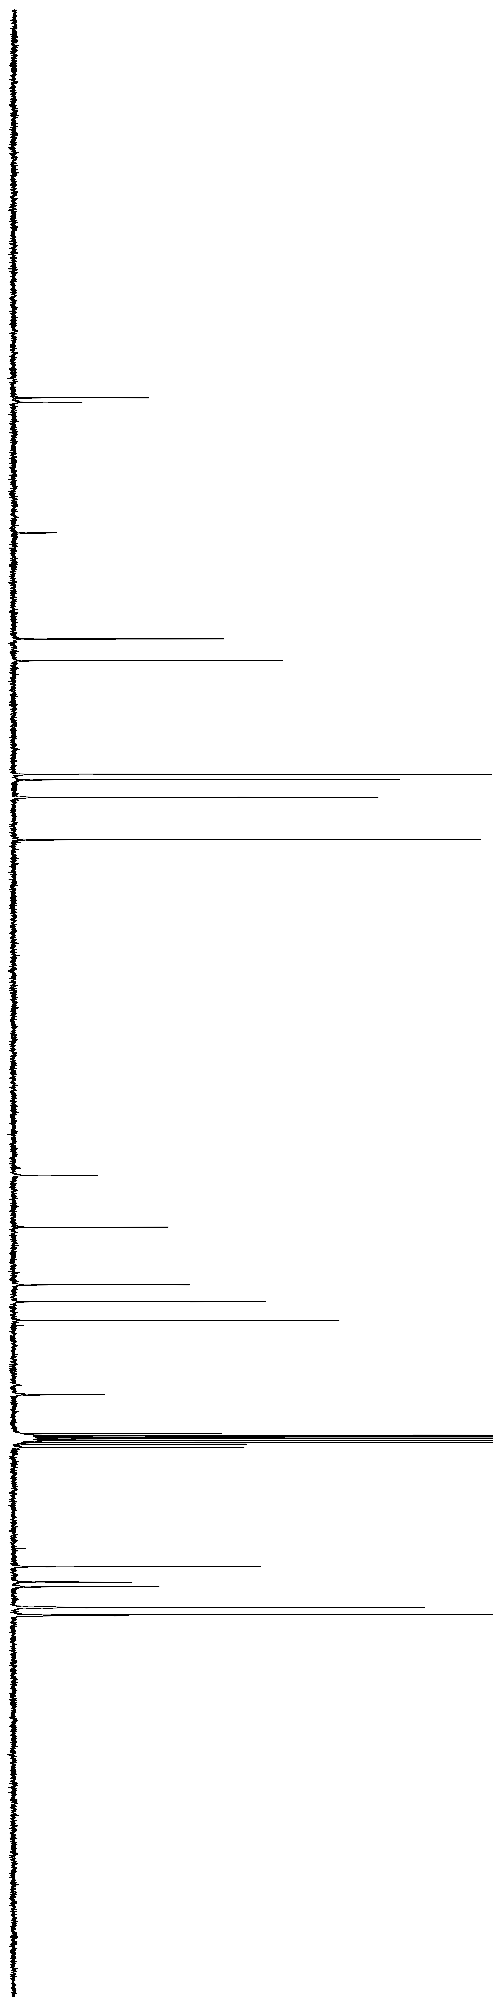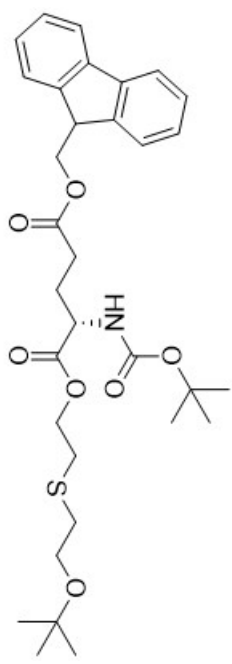

- 172.76
- 172.21
- 156.55
- 143.78
- 141.18
- 127.52
- 126.87
- 124.76
- 119.68

- 79.32
- 73.12
- 66.18
- 64.15
- 61.91
- 61.31
- 52.98
- 48.32
- 48.23
- 48.10
- 48.02
- 47.89
- 47.81
- 47.68
- 47.60
- 47.47
- 47.25
- 47.04
- 46.63
- 34.50
- 32.32
- 30.44
- 29.91
- 27.41
- 26.53
- 26.49
- 26.42

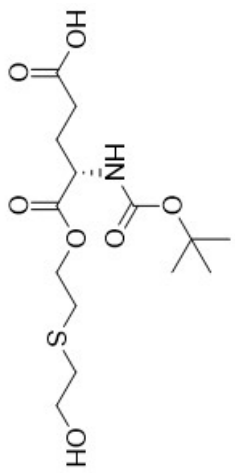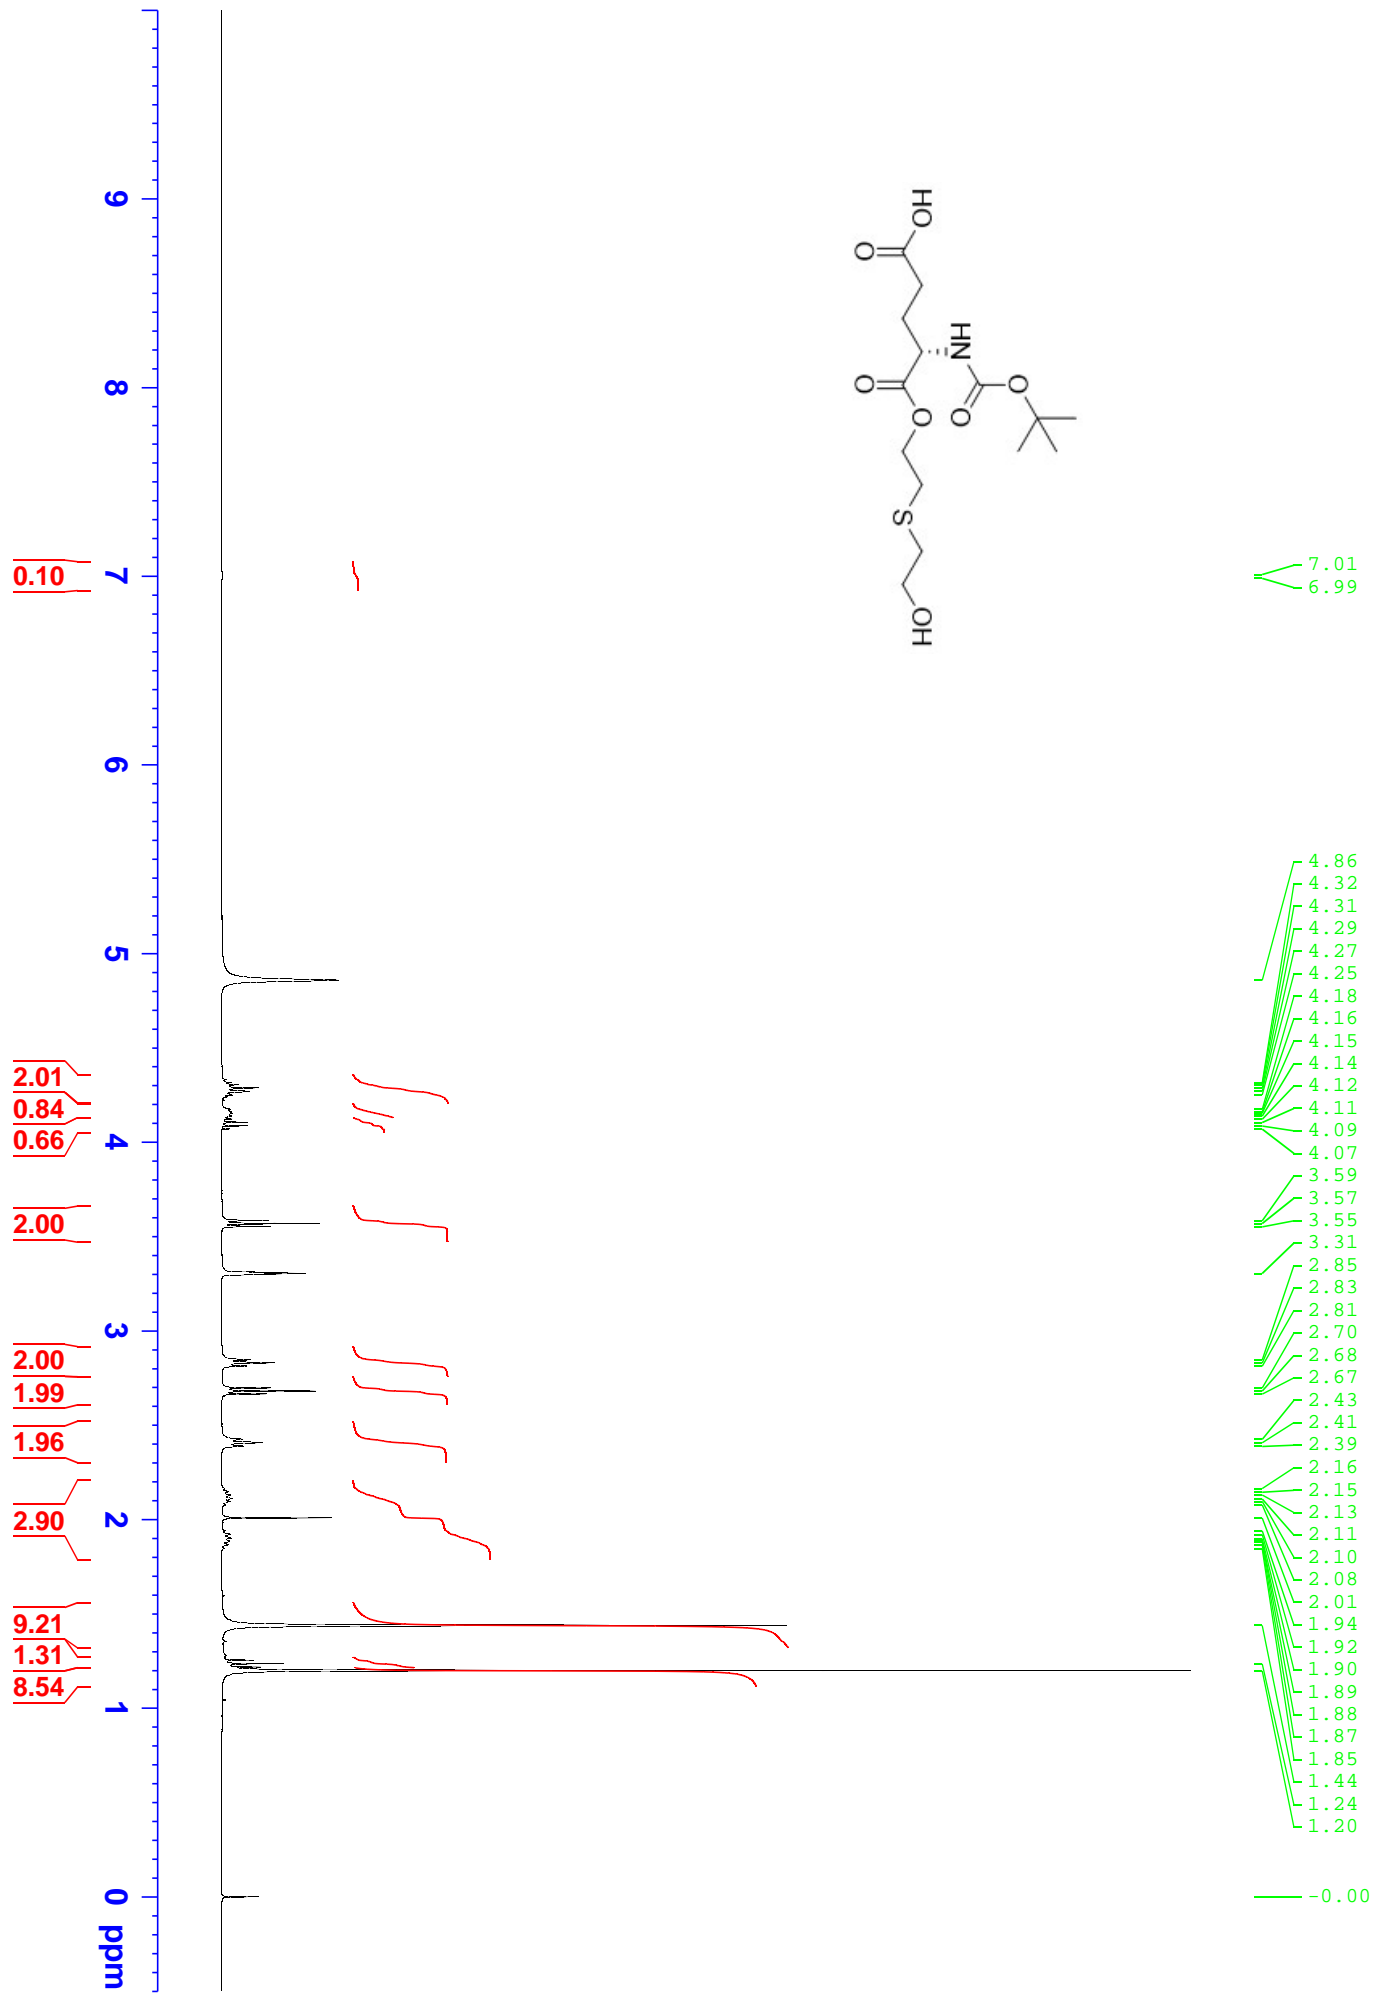

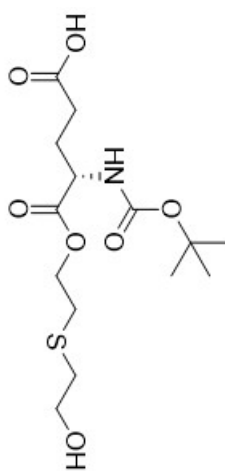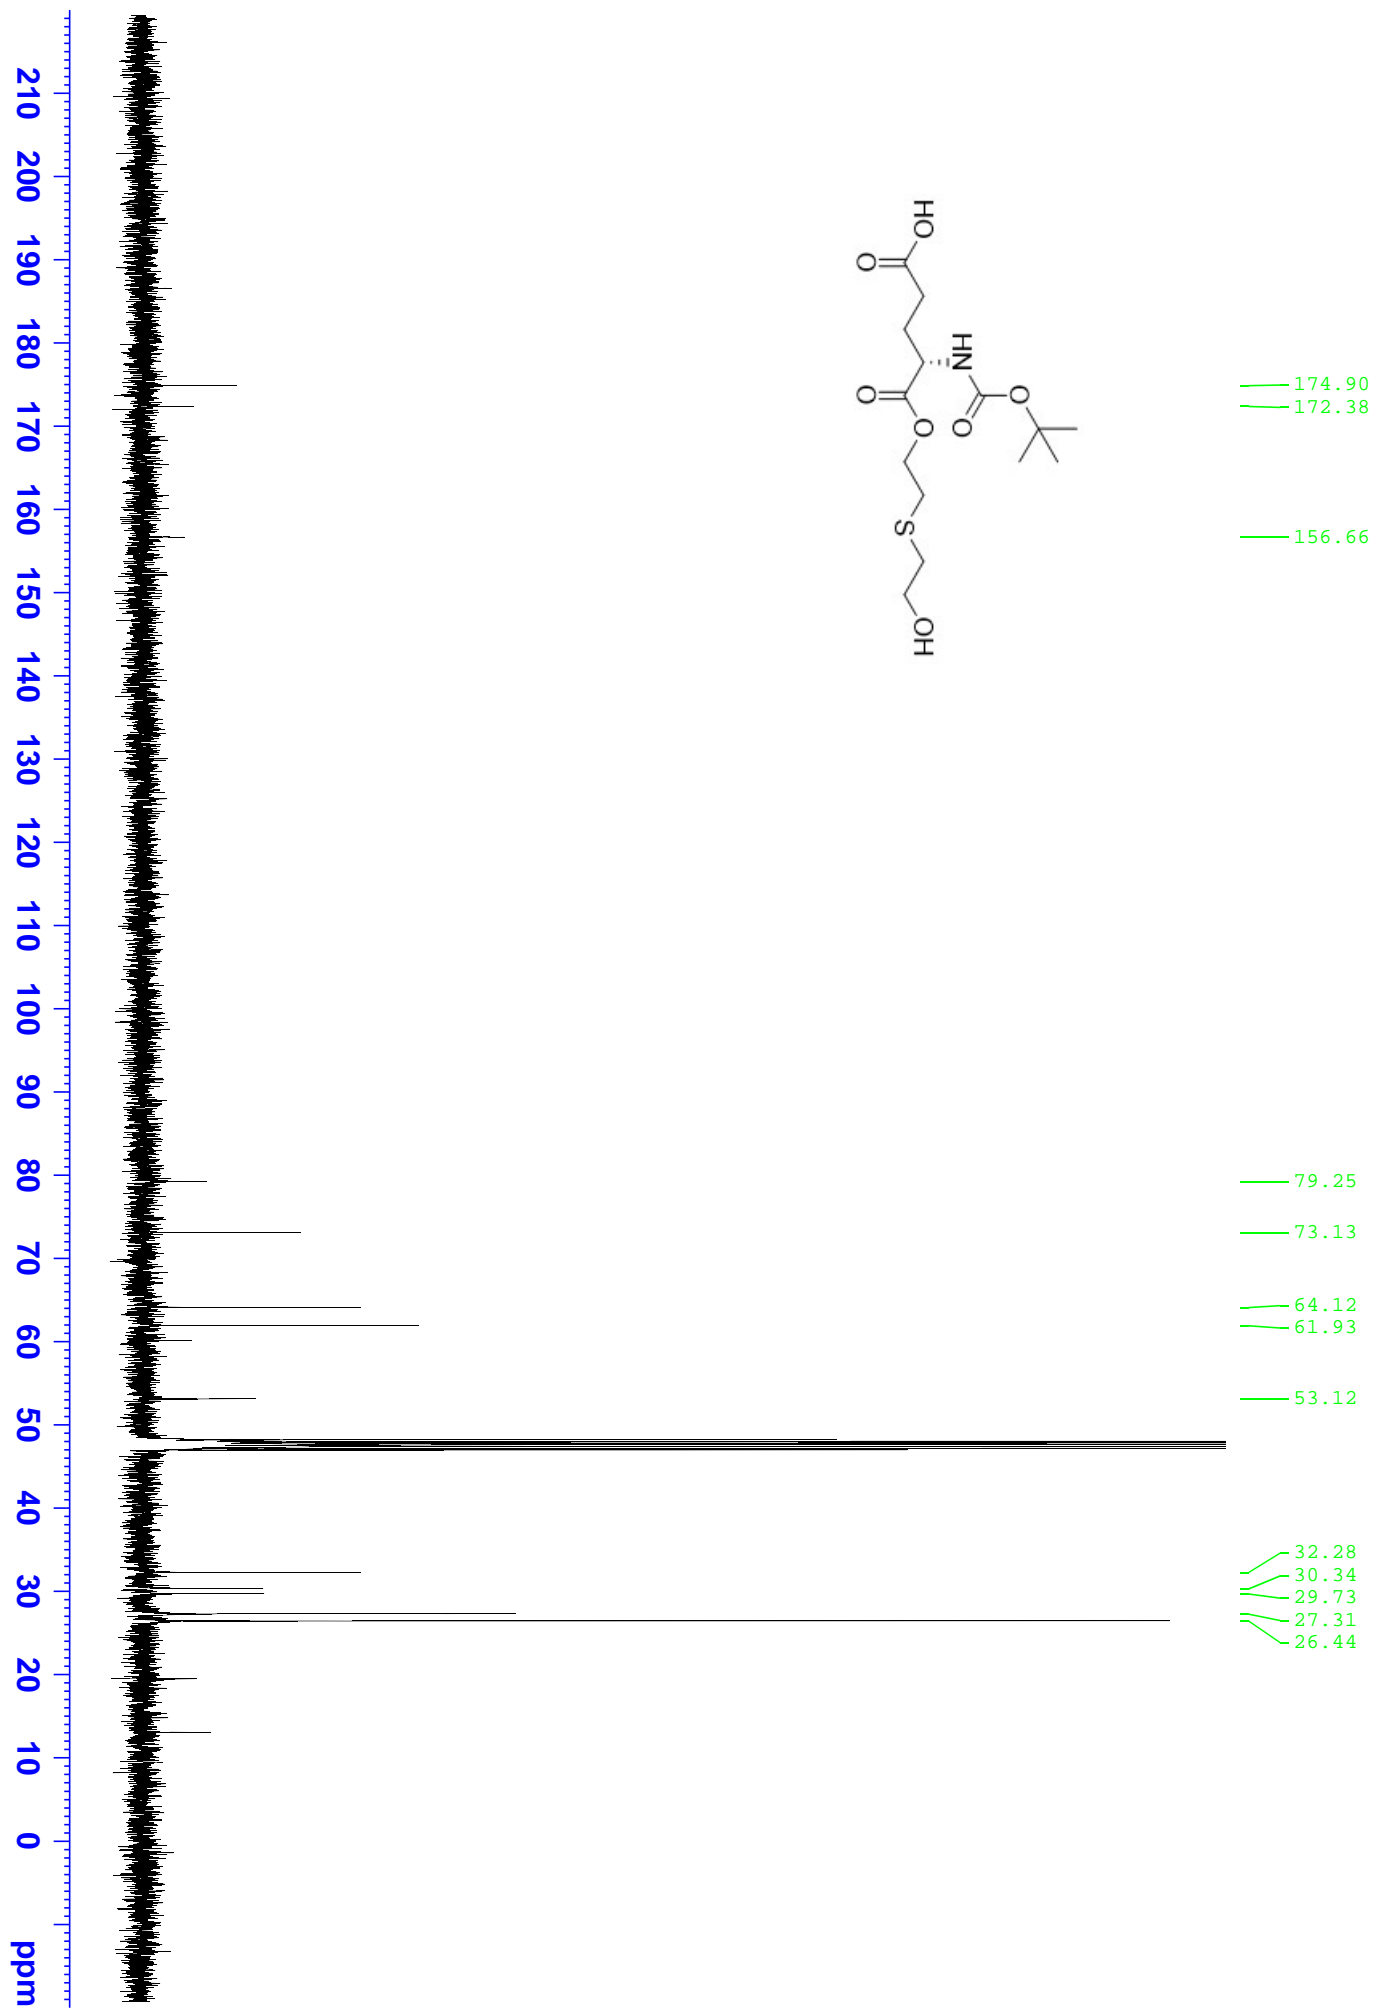

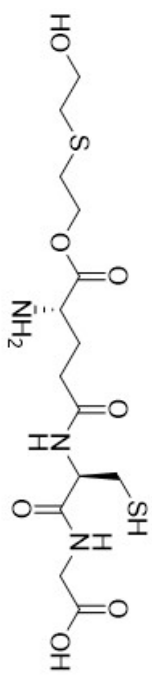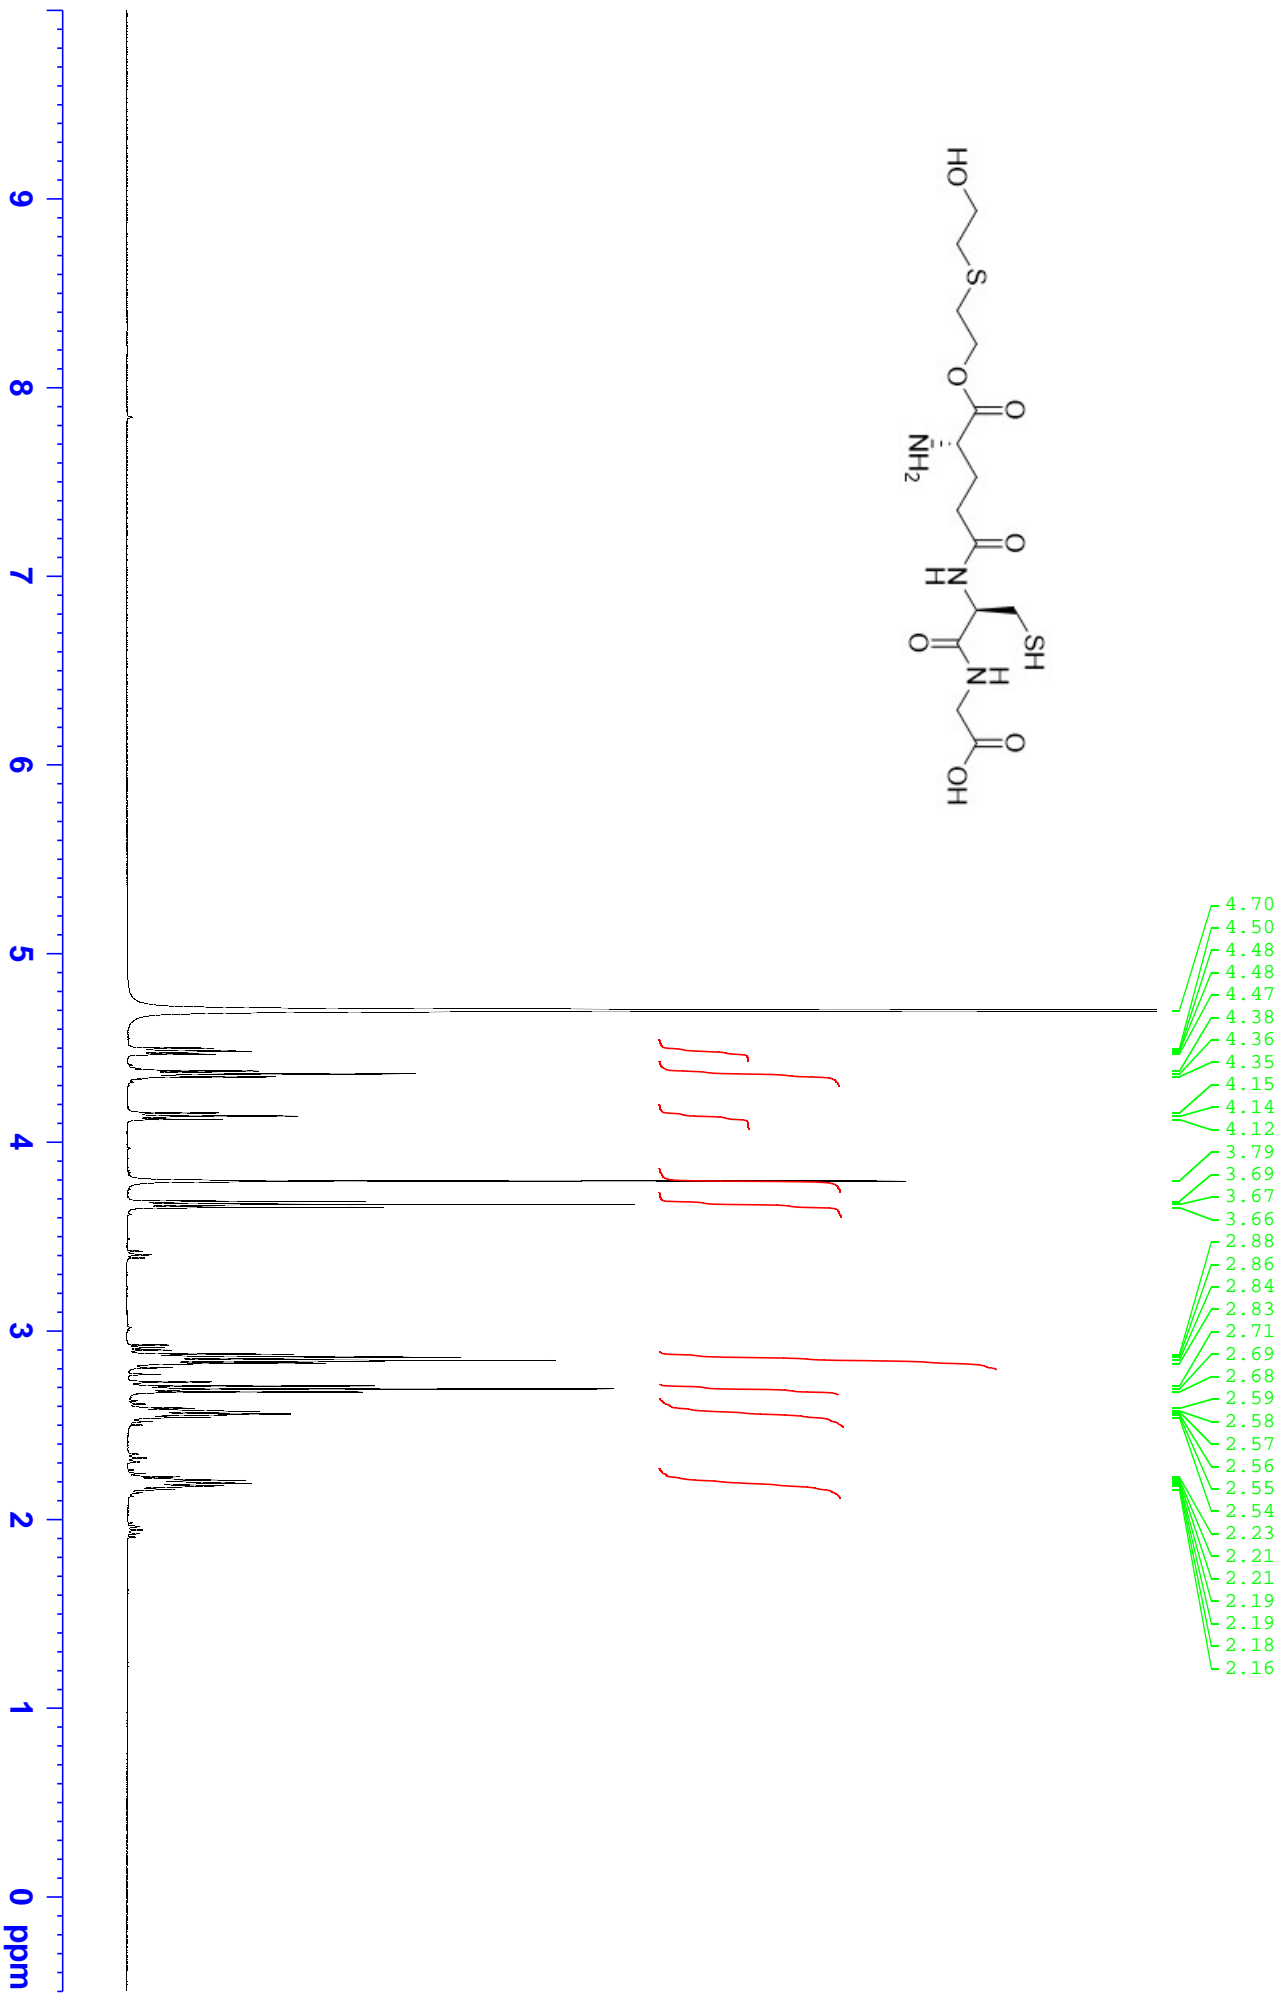

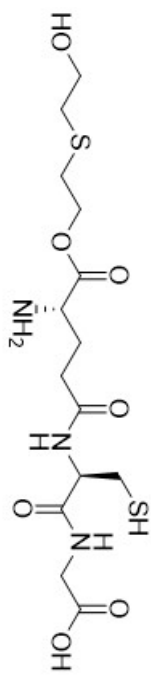

174.84  
174.15  
171.82  
169.47

65.26  
60.25  
55.54  
52.11  
42.40  
33.50  
30.72  
29.61  
25.44  
25.30

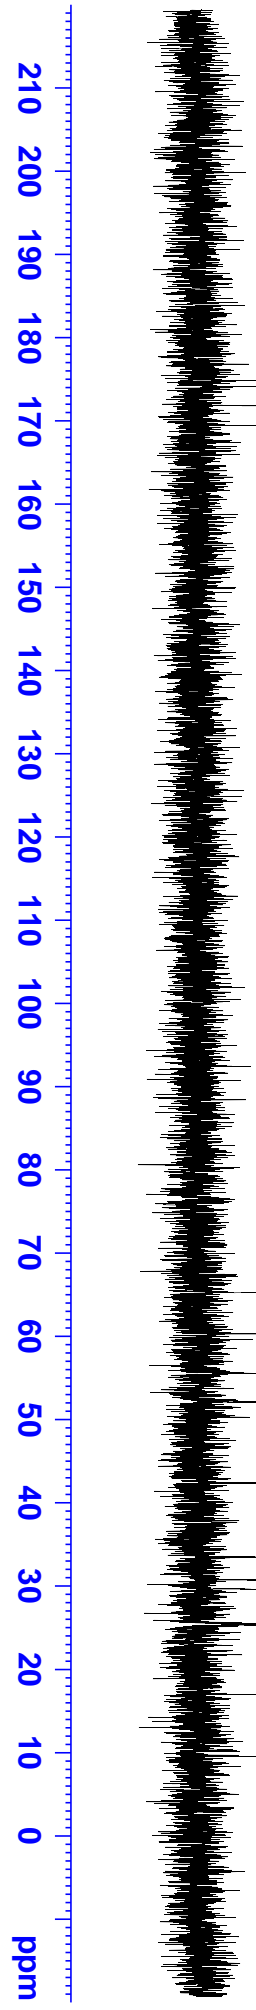

Supplement: c8ra03360a1.pdf [file c8ra03360a1.pdf]
